# Supplementary material for: The first palladium-catalyzed 1,4-addition of terminal alkenes to acrylate esters
Source: Royal Society of Chemistry journal article supplement (doi:10.1039/c3cc41742e), 2013-01-01

## Supporting Information

### The first palladium-catalyzed 1,4-addition of terminal alkenes to acrylate esters

Pei Liu, Heng-shan Wang, Ying-ming Pan,\* Wei-long Dai, Hong Liang, and Zhen-Feng Chen\*

*Key Laboratory for the Chemistry and Molecular Engineering of Medicinal Resources (Ministry of Education of China), School of Chemistry & Chemical Engineering of Guangxi Normal University, Guilin 541004 (China)*

### Table of Contents

|                                                                                      |               |
|--------------------------------------------------------------------------------------|---------------|
| <b>1 General Information .....</b>                                                   | <b>S2</b>     |
| <b>2 General Experimental Procedure.....</b>                                         | <b>S2</b>     |
| <b>3 Characterization of the Compounds .....</b>                                     | <b>S3-7</b>   |
| <b>4 References.....</b>                                                             | <b>S8</b>     |
| <b>5 Copies of <sup>1</sup>H NMR and <sup>13</sup>C NMR Spectra of Products.....</b> | <b>S9-22</b>  |
| <b>6 Copies of HRMS Spectra of Products.....</b>                                     | <b>S23-27</b> |

## 1 General Information Methods.

All manipulations were performed under an air atmosphere unless otherwise statement. Column chromatography was performed on silica gel (300–400 mesh). NMR spectra were obtained using a Bruker Avance 500 spectrometer ( $^1\text{H}$  at 500 MHz and  $^{13}\text{C}$  at 125 MHz). Chemical shifts for  $^1\text{H}$  NMR spectra are reported in parts per million (ppm) from tetramethylsilane with the solvent resonance as the internal standard ( $\text{CDCl}_3$ :  $\delta$  7.26 ppm). Chemical shifts for  $^{13}\text{C}$  NMR spectra are reported in parts per million (ppm) from tetramethylsilane with the solvent as the internal standard ( $\text{CDCl}_3$ :  $\delta$  77.0 ppm). High resolution mass spectra (HRMS) were recorded on the Exactive Mass Spectrometer (Thermo Scientific, USA) equipped with APCI or ECI ionization source.

**Materials.** Unless stated otherwise, commercial reagents were used without further purification. All reagents were weighed and handled in air at room temperature.

## 2 General Experimental Procedure

The reaction mixture of alkenes **1** (0.5 mmol), acrylate esters **2** (0.75 mmol),  $\text{PdCl}_2$  (6 mol%), and  $\text{PhCl}$  (2 mL) in a 15 mL sealed tube was stirred at 110 °C for 72 h, and monitored periodically by TLC. Upon completion, the reaction mixture was diluted with water (30 mL) and extracted with ethyl acetate ( $3 \times 30$  mL). The combined organic layers were washed with water and brine, dried over  $\text{Na}_2\text{SO}_4$  and filtered. The solvent was removed under vacuum. The residue was purified by flash column chromatography to afford (*E*)-alkenyl esters.

### 3 Characterization of the Compounds

#### (*E*)-Ethyl 5-phenylpent-4-enoate (3aa)

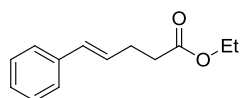

Yellowish oil;  $^1\text{H NMR}$  (500 MHz,  $\text{CDCl}_3$ )  $\delta$  7.35-7.33 (m, 2H), 7.31-7.28 (m, 2H), 7.22-7.19 (m, 1H), 6.44 (d,  $J = 15.8$  Hz, 1H), 6.22 (dt,  $J = 15.8$ , 6.6 Hz, 1H), 4.15 (q,  $J = 7.1$  Hz, 2H), 2.57-2.53 (m, 2H), 2.51-2.46 (m, 2H), 1.26 (t,  $J = 7.1$  Hz, 3H);  $^{13}\text{C NMR}$  (125 MHz,  $\text{CDCl}_3$ )  $\delta$  173.0, 137.3, 130.9, 128.5, 127.1, 126.0, 60.4, 34.0, 28.3, 14.2; **ESI HRMS** exact mass calcd for  $(\text{C}_{13}\text{H}_{16}\text{O}_2\text{Na})^+$  requires  $m/z$  227.10480, found  $m/z$  227.10374.

The NMR data was in good agreement with that reported in the literature.<sup>1</sup>

#### (*E*)-Methyl 5-phenylpent-4-enoate (3ab)

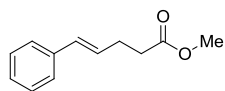

Yellow oil;  $^1\text{H NMR}$  (500 MHz,  $\text{CDCl}_3$ )  $\delta$  7.34 (d,  $J = 7.4$  Hz, 2H), 7.31-7.28 (m, 2H), 7.22 (d,  $J = 7.2$  Hz, 1H), 6.44 (d,  $J = 15.9$  Hz, 1H), 6.21 (dt,  $J = 15.8$ , 6.5 Hz, 1H), 3.70 (s, 3H), 2.57-2.53 (m, 2H), 2.51-2.48 (m, 2H);  $^{13}\text{C NMR}$  (125 MHz,  $\text{CDCl}_3$ )  $\delta$  173.4, 137.3, 131.0, 128.5, 128.4, 127.1, 126.0, 51.6, 33.8, 28.2; **ESI HRMS** exact mass calcd for  $(\text{C}_{12}\text{H}_{15}\text{O}_2)^+$  requires  $m/z$  191.10720, found  $m/z$  191.10664.

The NMR data was in good agreement with that reported in the literature.<sup>2</sup>

#### (*E*)-Butyl 5-phenylpent-4-enoate (3ac)

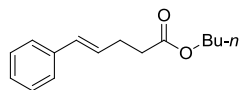

Yellow oil;  $^1\text{H NMR}$  (500 MHz,  $\text{CDCl}_3$ )  $\delta$  7.34 (d,  $J = 7.3$  Hz, 2H), 7.31-7.28 (m, 2H), 7.22-7.20 (m, 1H), 6.44 (d,  $J = 15.9$  Hz, 1H), 6.22 (dt,  $J = 15.8$ , 6.6 Hz, 1H), 4.11 (t,  $J = 6.7$  Hz, 2H), 2.57-2.53 (m, 2H), 2.52-2.47 (m, 2H), 1.65-1.59 (m, 2H), 1.43-1.35 (m, 2H), 0.93 (t,  $J = 7.4$  Hz, 3H);  $^{13}\text{C NMR}$  (125 MHz,  $\text{CDCl}_3$ )  $\delta$  173.0, 137.3, 130.9, 128.4, 127.1, 126.0, 64.3, 34.0, 30.6, 28.3, 19.1, 13.6; **APCI**

**HRMS** exact mass calcd for  $(C_{15}H_{21}O_2)^+$  requires  $m/z$  233.15415, found  $m/z$  233.15385.

**(E)-Isobutyl 5-phenylpent-4-enoate (3ad)**

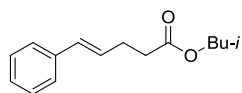

Yellowish oil;  $^1H$  NMR (500 MHz,  $CDCl_3$ )  $\delta$  7.36-7.34 (m, 2H), 7.32-7.29 (m, 2H), 7.23-7.20 (m, 1H), 6.45 (d,  $J = 15.9$  Hz, 1H), 6.23 (dt,  $J = 15.8$ , 6.5 Hz, 1H), 3.90 (d,  $J = 6.7$  Hz, 2H), 2.59-2.54 (m, 2H), 2.53-2.49 (m, 2H), 1.97-1.92 (m, 1H), 0.95 (s, 3H), 0.94 (s, 3H);  $^{13}C$  NMR (125 MHz,  $CDCl_3$ )  $\delta$  173.0, 137.3, 130.9, 128.4, 127.1, 127.0, 126.0, 70.5, 34.0, 28.3, 27.7, 19.0; **APCI HRMS** exact mass calcd for  $(C_{15}H_{21}O_2)^+$  requires  $m/z$  233.15415, found  $m/z$  233.15387.

**(E)-Tert-butyl 5-phenylpent-4-enoate (3ae)**

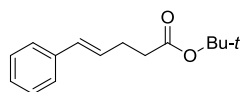

Yellow oil;  $^1H$  NMR (500 MHz,  $CDCl_3$ )  $\delta$  7.33 (d,  $J = 7.0$  Hz, 2H), 7.31-7.28 (m, 3H), 6.42 (d,  $J = 15.9$  Hz, 1H), 6.21 (dt,  $J = 15.8$ , 6.7 Hz, 1H), 2.52-2.48 (m, 2H), 2.41-2.38 (m, 2H), 1.45 (s, 9H);  $^{13}C$  NMR (125 MHz,  $CDCl_3$ )  $\delta$  172.4, 139.7, 130.7, 128.8, 128.5, 127.0, 126.0, 80.3, 35.2, 29.7, 28.1; **APCI HRMS** exact mass calcd for  $(C_{15}H_{21}O_2)^+$  requires  $m/z$  233.15415, found  $m/z$  233.15297.

**(E)-Isobutyl 5-(o-tolyl)pent-4-enoate (3bd)**

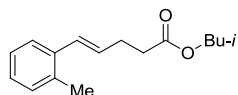

Yellow oil;  $^1H$  NMR (500 MHz,  $CDCl_3$ )  $\delta$  7.40 (d,  $J = 5.7$  Hz, 1H), 7.18-7.13 (m, 3H), 6.65 (d,  $J = 15.7$  Hz, 1H), 6.10 (dt,  $J = 15.5$ , 6.6 Hz, 1H), 3.90 (d,  $J = 6.7$  Hz, 2H), 2.61-2.57 (m, 2H), 2.55-2.51 (m, 2H), 2.34 (s, 3H), 1.98-1.91 (m, 1H), 0.96 (s, 3H), 0.95 (s, 3H);  $^{13}C$  NMR (125 MHz,  $CDCl_3$ )  $\delta$  173.0, 136.5, 135.0, 130.1, 129.8, 128.8, 127.0, 126.0, 125.5, 70.5, 34.2, 28.6, 27.7, 19.7, 19.1; **APCI HRMS** exact mass calcd for  $(C_{16}H_{23}O_2)^+$  requires  $m/z$  247.16980, found  $m/z$  247.16870.

**(E)-Methyl 5-(p-tolyl)pent-4-enoate (3ca)**

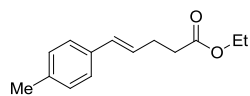

Yellowish oil;  $^1\text{H NMR}$  (500 MHz,  $\text{CDCl}_3$ )  $\delta$  7.23 (d,  $J = 8.0$  Hz, 2H), 7.10 (d,  $J = 7.9$  Hz, 2H), 6.40 (d,  $J = 15.9$  Hz, 1H), 6.15 (dt,  $J = 15.8, 6.6$  Hz, 1H), 4.15 (q,  $J = 7.1$  Hz, 2H), 2.56-2.49 (m, 2H), 2.49-2.45 (m, 2H), 2.33 (s, 3H), 1.26 (t,  $J = 7.2$  Hz, 3H);  $^{13}\text{C NMR}$  (125 MHz,  $\text{CDCl}_3$ )  $\delta$  173.1, 136.9, 134.6, 130.7, 129.2, 127.4, 125.9, 60.4, 34.1, 28.3, 21.1, 14.3; **APCI HRMS** exact mass calcd for  $(\text{C}_{14}\text{H}_{19}\text{O}_2)^+$  requires  $m/z$  219.13850, found  $m/z$  219.13763.

**(E)-Ethyl 5-(4-bromophenyl)pent-4-enoate (3da)**

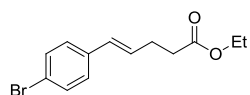

Yellow oil;  $^1\text{H NMR}$  (500 MHz,  $\text{CDCl}_3$ )  $\delta$  7.41 (d,  $J = 1.9$  Hz, 1H), 7.40 (d,  $J = 1.8$  Hz, 1H), 7.20 (d,  $J = 2.0$  Hz, 1H), 7.18 (d,  $J = 1.7$  Hz, 1H), 6.36 (d,  $J = 15.9$  Hz, 1H), 6.20 (dt,  $J = 15.8, 6.4$  Hz, 1H), 4.14 (q,  $J = 7.1$  Hz, 2H), 2.54-2.50 (m, 2H), 2.49-2.45 (m, 2H), 1.25 (t,  $J = 7.1$  Hz, 3H);  $^{13}\text{C NMR}$  (125 MHz,  $\text{CDCl}_3$ )  $\delta$  172.9, 136.3, 131.6, 129.8, 129.4, 127.6, 120.8, 60.4, 33.9, 28.3, 14.3; **APCI HRMS** exact mass calcd for  $(\text{C}_{13}\text{H}_{16}\text{O}_2\text{Br})^+$  requires  $m/z$  283.03337, found  $m/z$  283.03040.

**(E)-Isobutyl 5-(4-fluorophenyl)pent-4-enoate (3ed)**

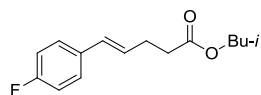

Yellow oil;  $^1\text{H NMR}$  (500 MHz,  $\text{CDCl}_3$ )  $\delta$  7.30-7.26 (m, 2H), 6.99-6.94 (m, 2H), 6.39 (d,  $J = 15.9$  Hz, 1H), 6.12 (dt,  $J = 15.8, 6.4$  Hz, 1H), 3.87 (d,  $J = 6.6$  Hz, 2H), 2.55-2.47 (m, 4H), 1.96-1.88 (m, 1H), 0.93 (s, 3H), 0.92 (s, 3H);  $^{13}\text{C NMR}$  (125 MHz,  $\text{CDCl}_3$ )  $\delta$  173.0, 163.0 and 161.0, 133.5, 129.7, 128.2, 127.5, 127.4, 115.4 and 115.2, 70.6, 34.0, 28.2, 27.7, 19.0; **APCI HRMS** exact mass calcd for  $(\text{C}_{15}\text{H}_{20}\text{O}_2\text{F})^+$  requires  $m/z$  251.14473, found  $m/z$  251.14366.

**(E)-Methyl 5-phenylhex-4-enoate (3fb)**

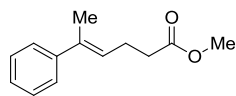

Yellow oil;  $^1\text{H NMR}$  (500 MHz,  $\text{CDCl}_3$ )  $\delta$  7.39 (d,  $J = 7.5$  Hz, 2H), 7.34-7.31 (m, 2H), 7.25 (d,  $J = 7.4$  Hz, 1H), 5.78-5.72 (m, 1H), 3.71 (s, 3H), 2.57-2.54 (m, 2H), 2.50-2.47 (m, 2H), 2.08 (s, 3H);  $^{13}\text{C NMR}$  (125 MHz,  $\text{CDCl}_3$ )  $\delta$  173.5, 143.5, 136.2, 128.1, 126.7, 125.9, 125.6, 51.5, 33.8, 24.2, 15.7; **ESI HRMS** exact mass calcd for  $(\text{C}_{13}\text{H}_{17}\text{O}_2)^+$  requires  $m/z$  205.12285, found  $m/z$  205.12259.

**(E)-Isobutyl 5-phenylhex-4-enoate (3fd)**

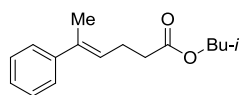

Yellow oil;  $^1\text{H NMR}$  (500 MHz,  $\text{CDCl}_3$ )  $\delta$  7.38-7.35 (m, 2H), 7.32-7.29 (m, 2H), 7.24-7.21 (m, 1H), 5.76-5.72 (m, 1H), 3.88 (d,  $J = 6.7$  Hz, 2H), 2.57-2.52 (m, 2H), 2.49-2.45 (m, 2H), 2.06 (s, 3H), 1.95-1.91 (m, 1H), 0.94 (s, 3H), 0.93 (s, 3H);  $^{13}\text{C NMR}$  (125 MHz,  $\text{CDCl}_3$ )  $\delta$  173.3, 143.6, 139.0, 128.1, 126.7, 126.1, 125.6, 70.6, 34.2, 27.7, 24.3, 19.1, 15.8; **APCI HRMS** exact mass calcd for  $(\text{C}_{16}\text{H}_{23}\text{O}_2)^+$  requires  $m/z$  247.16980, found  $m/z$  247.16943.

**(E)-Isobutyl 5-(4-chlorophenyl)hex-4-enoate (3gd)**

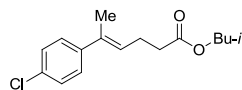

Yellow oil;  $^1\text{H NMR}$  (500 MHz,  $\text{CDCl}_3$ )  $\delta$  7.30-7.26 (m, 4H), 5.75-5.72 (m, 1H), 3.89 (d,  $J = 6.7$  Hz, 2H), 2.55-2.52 (m, 2H), 2.50-2.47 (m, 2H), 2.36-2.30 (m, 1H), 2.04 (s, 3H), 0.95 (s, 3H), 0.94 (s, 3H);  $^{13}\text{C NMR}$  (125 MHz,  $\text{CDCl}_3$ )  $\delta$  173.1, 142.0, 135.1, 132.4, 128.2, 126.9, 126.6, 70.6, 34.0, 27.7, 24.3, 19.0, 15.8; **APCI HRMS** exact mass calcd for  $(\text{C}_{16}\text{H}_{22}\text{O}_2\text{Cl})^+$  requires  $m/z$  281.13083, found  $m/z$  281.13016.

**(Z)-Methyl 4-(3,3-dimethylbicyclo[2.2.1]heptan-2-ylidene)butanoate (3ib)**

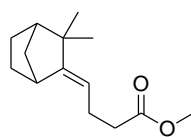

Yellow oil;  $^1\text{H NMR}$  (500 MHz,  $\text{CDCl}_3$ )  $\delta$  5.77-5.71 (m, 1H), 3.73 (s,

3H), 3.29-3.28 (m, 1H), 2.34-2.29 (m, 1H), 2.04-1.96 (m, 2H), 1.78-1.73 (m, 1H), 1.73-1.67 (m, 2H), 1.67-1.63 (m, 1H), 1.47-1.40 (m, 1H), 1.33-1.29 (m, 1H), 1.25-1.23 (m, 1H), 1.21-1.16 (m, 1H), 1.07 (s, 3H), 1.04 (s, 3H);  $^{13}\text{C}$  NMR (125 MHz,  $\text{CDCl}_3$ )  $\delta$  171.5, 168.2, 117.0, 51.3, 47.7, 43.2, 42.6, 37.4, 28.4, 28.3, 28.1, 25.3, 23.6; **APCI HRMS** exact mass calcd for  $(\text{C}_{14}\text{H}_{23}\text{O}_2)^+$  requires  $m/z$  223.16980, found  $m/z$  233.16942.

**D-(E)-Ethyl 5-phenylpent-4-enoate (3aa-d)**

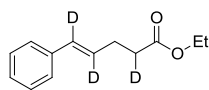

Yellow oil;  $^1\text{H}$  NMR (500 MHz,  $\text{CDCl}_3$ )  $\delta$  7.34 (d,  $J = 7.3$  Hz, 2H), 7.30 (t,  $J = 7.6$  Hz, 2H), 7.21 (t,  $J = 7.2$  Hz, 1H), 4.15 (q,  $J = 7.1$  Hz, 2H), 2.53 (d,  $J = 6.4$  Hz, 1H), 2.48 (dd,  $J = 11.3, 4.5$  Hz, 2H), 1.26 (t,  $J = 7.1$  Hz, 3H).

## 4 References

- 1 V. B. Phapale; M. Guisán-Ceinos; E. Buñuel; D. J. Cárdenas *Chem. Eur. J.* 2009, **15**, 12681-12688
- 2 C. M. Thompson; J. A. Frick *J. Org. Chem.* 1989, **54**, 890-896.



## 5 Copies of $^1\text{H}$ NMR and $^{13}\text{C}$ NMR Spectra of Products

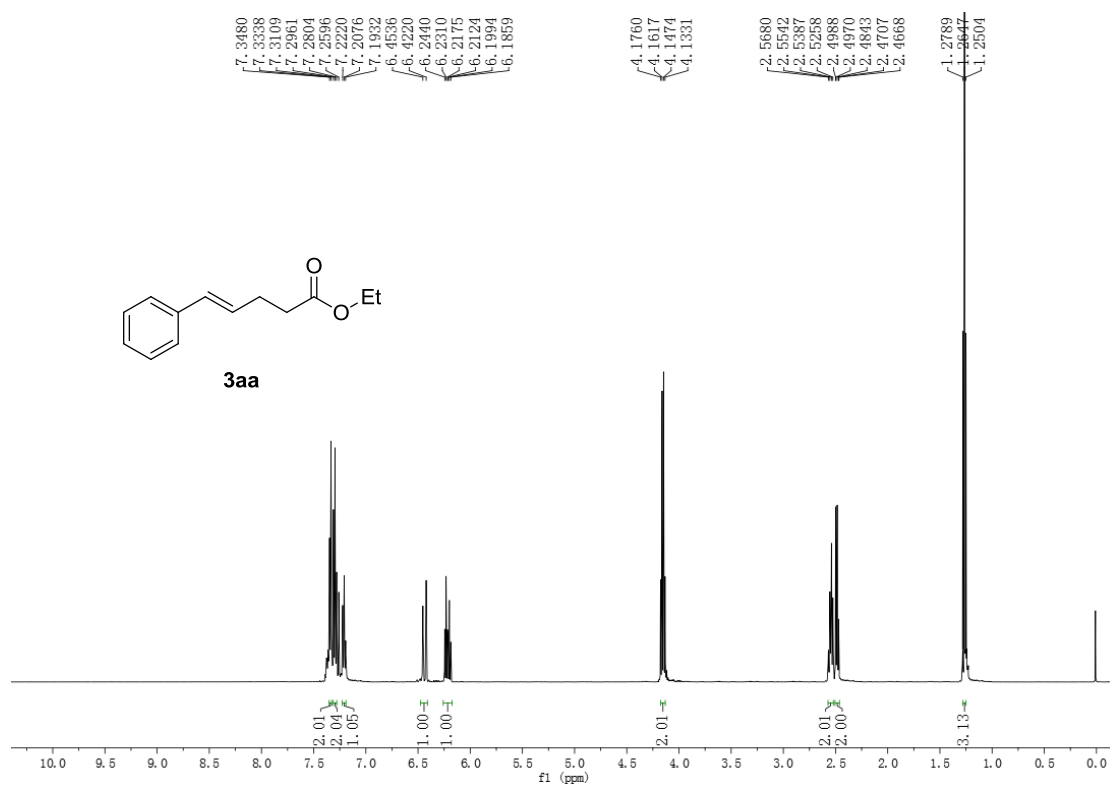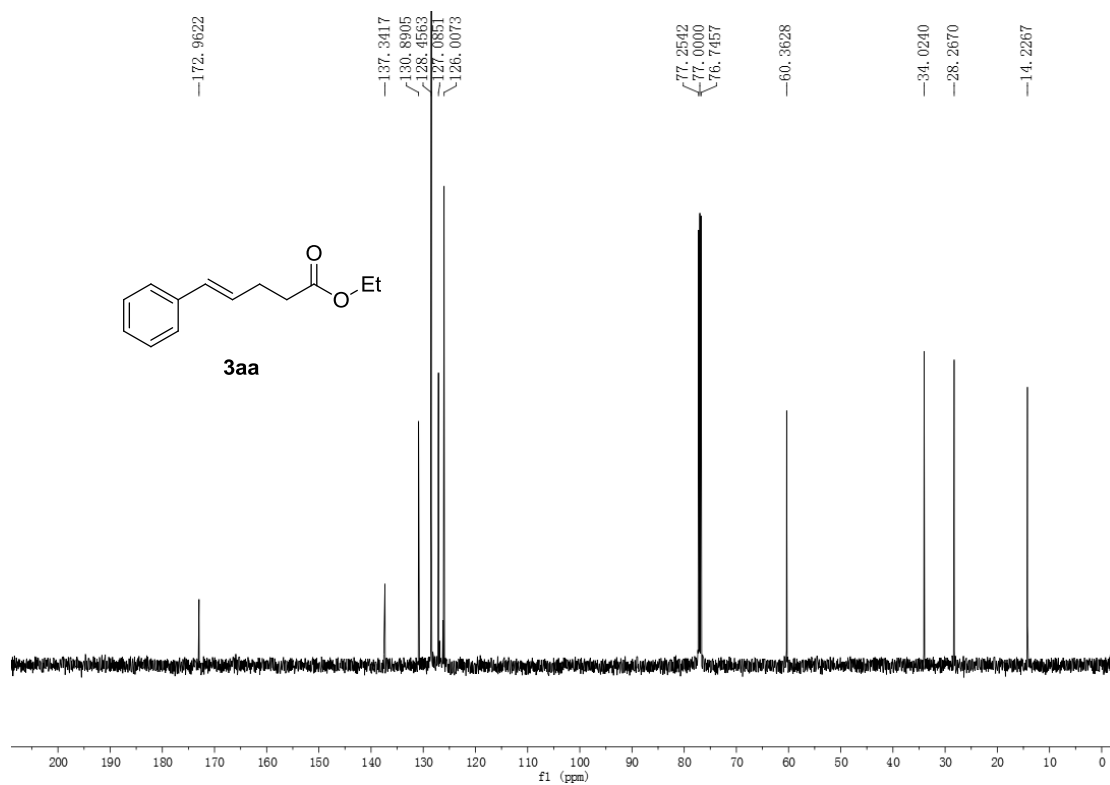

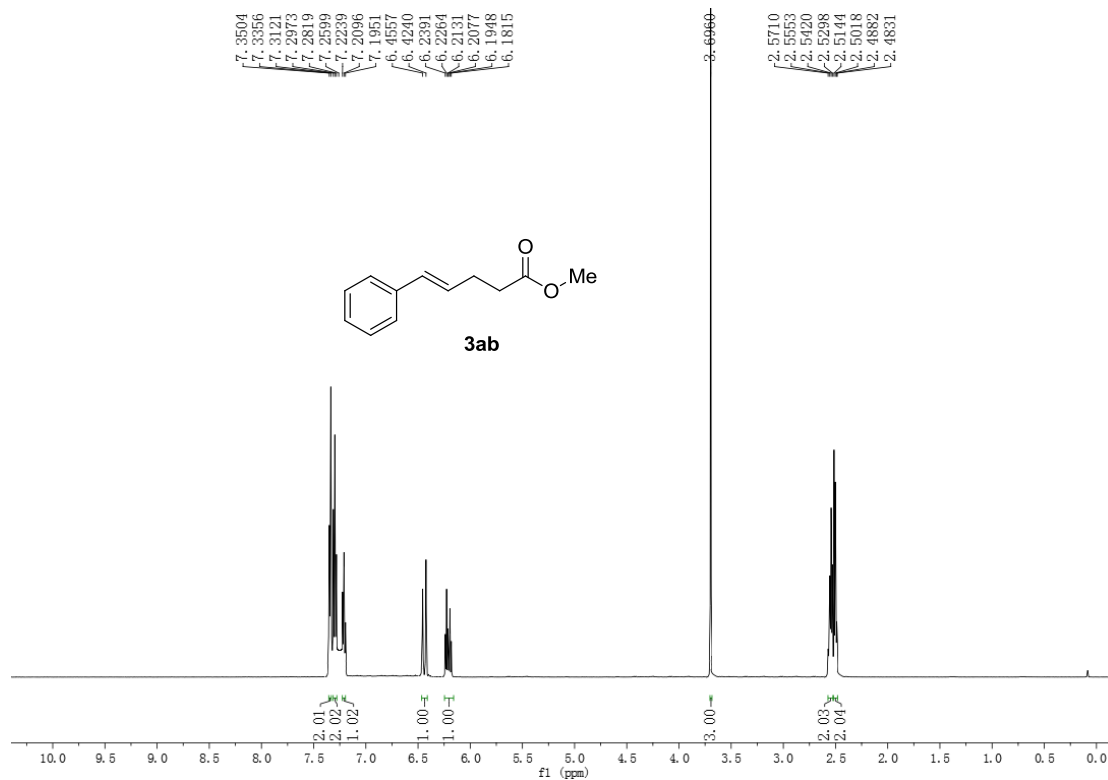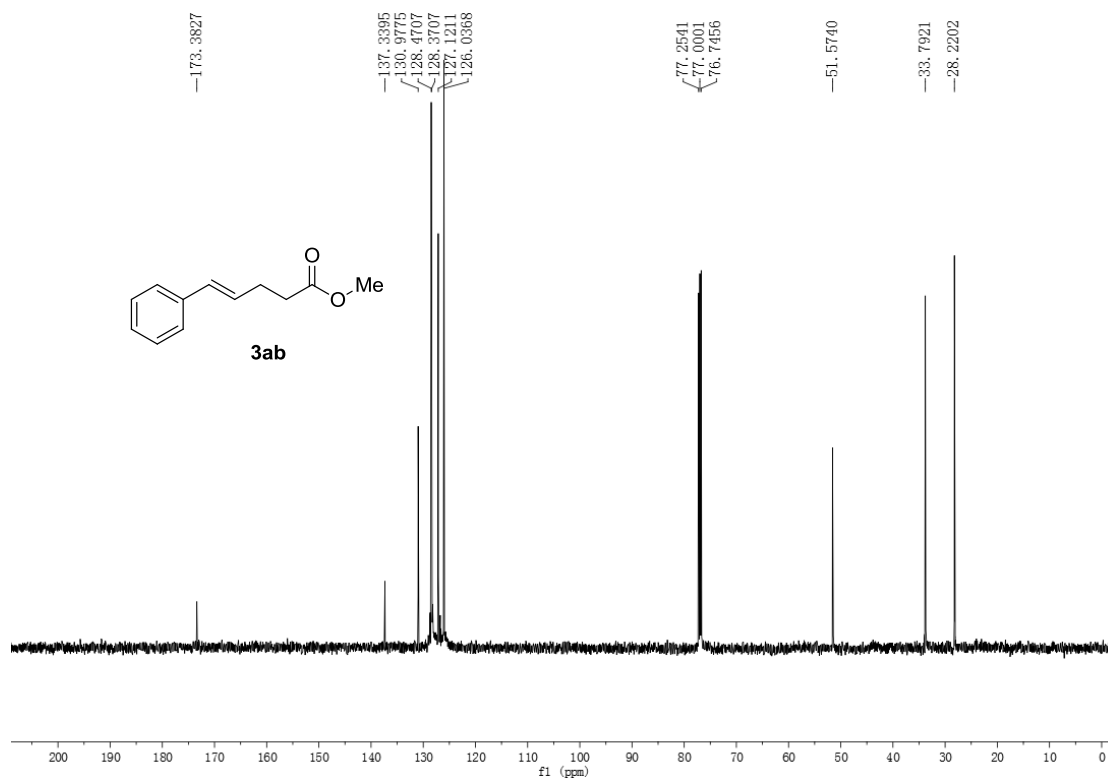

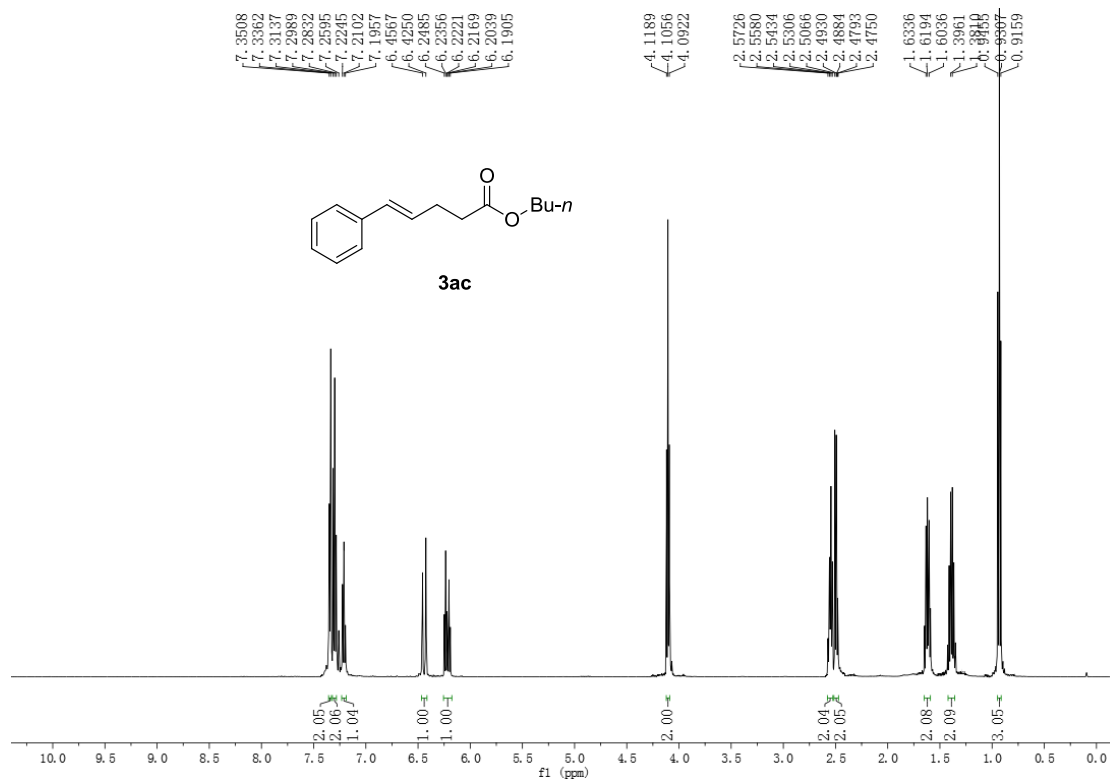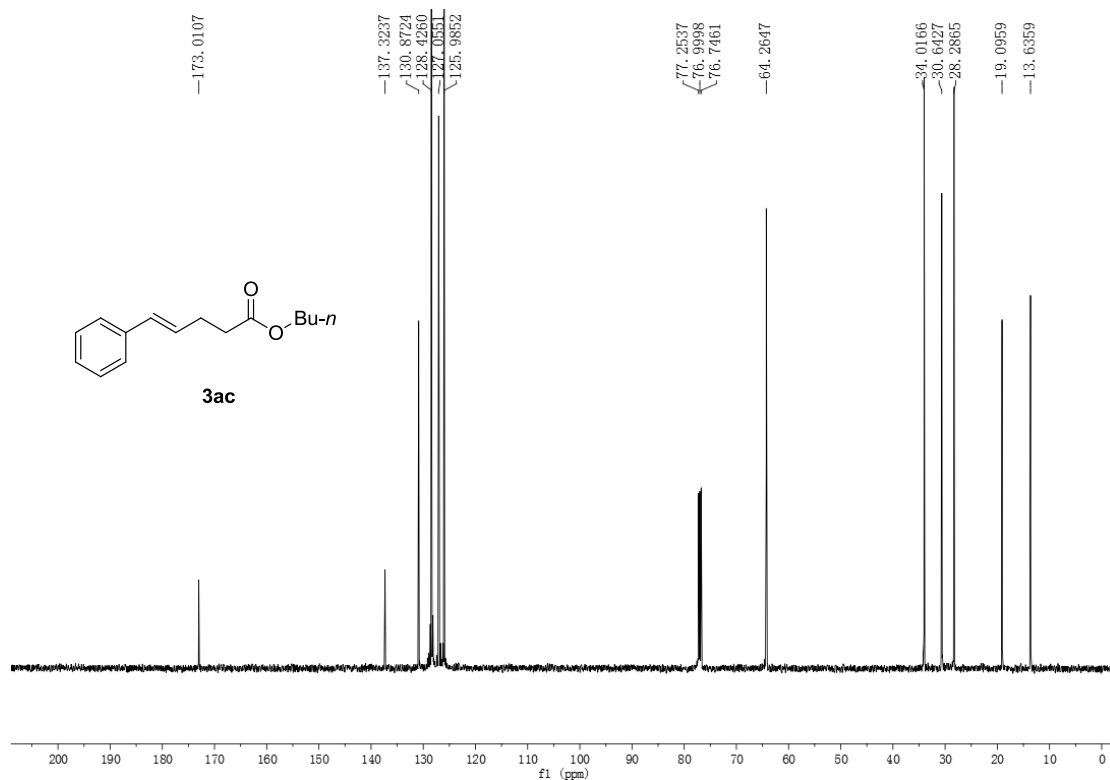

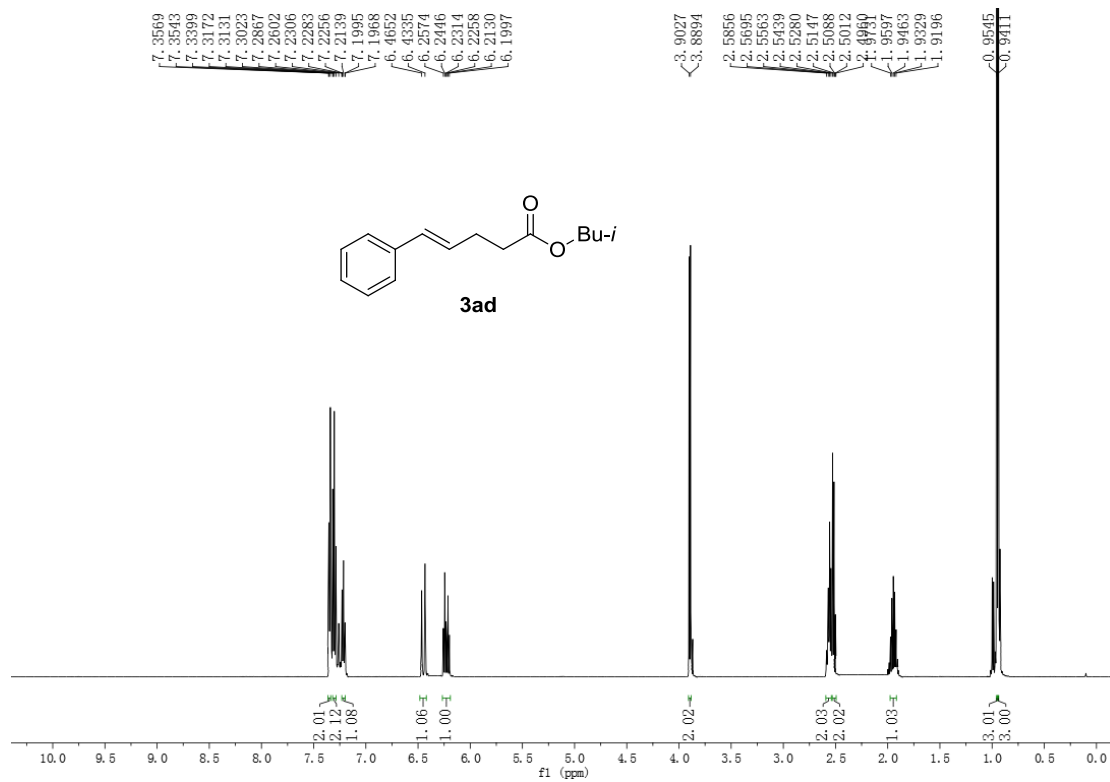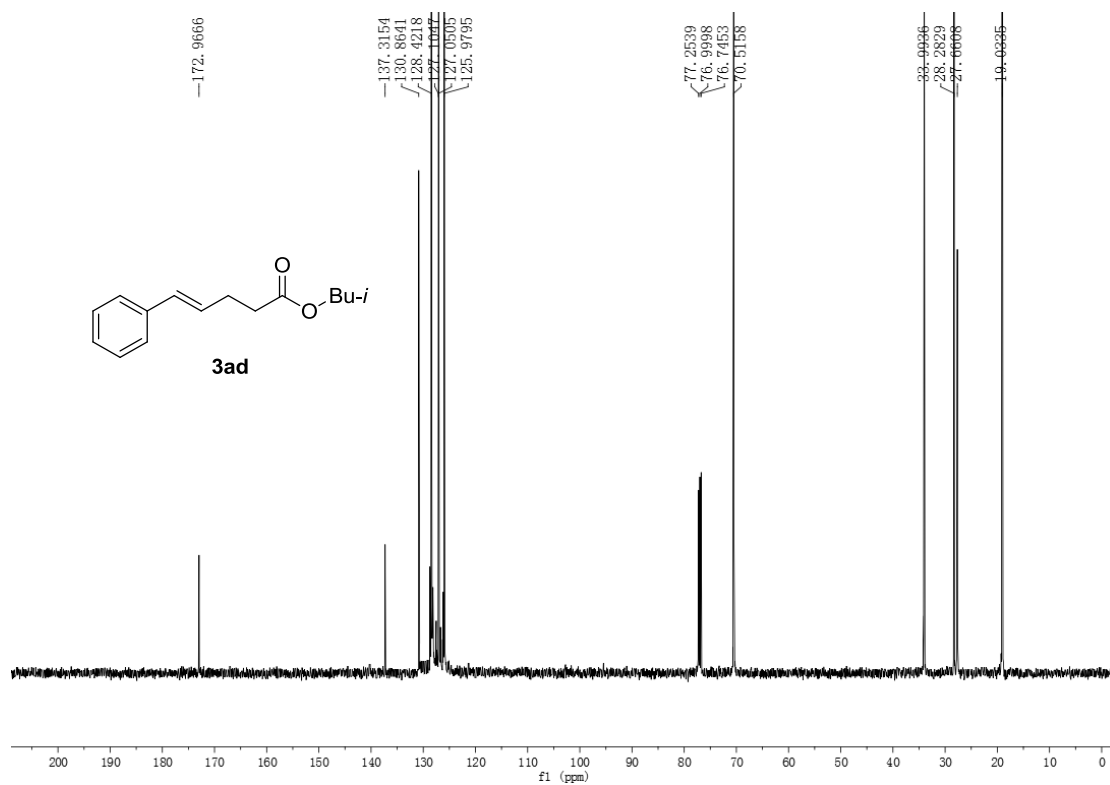

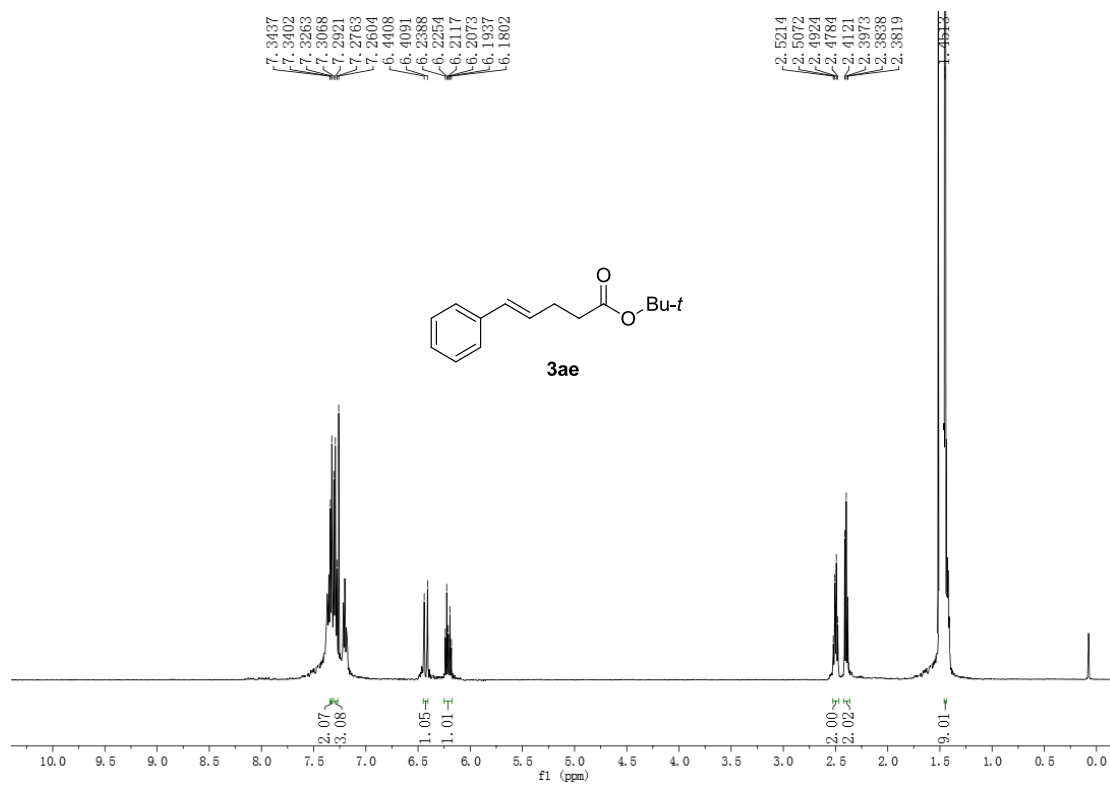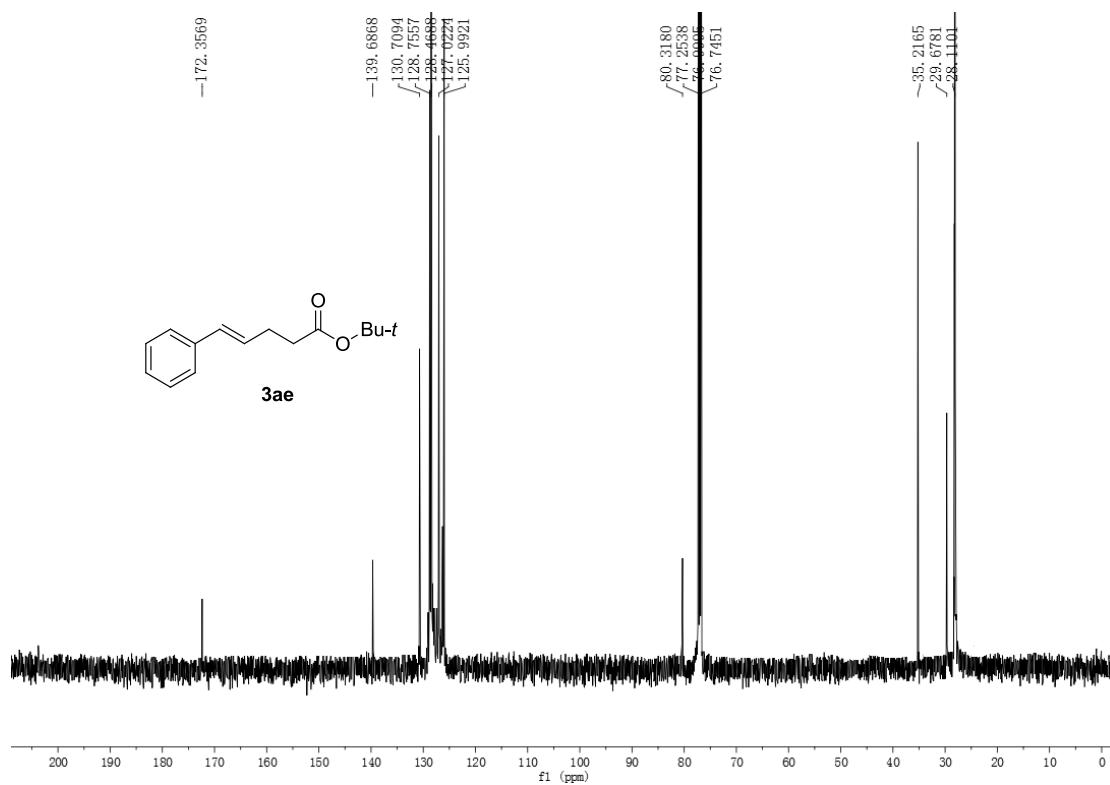

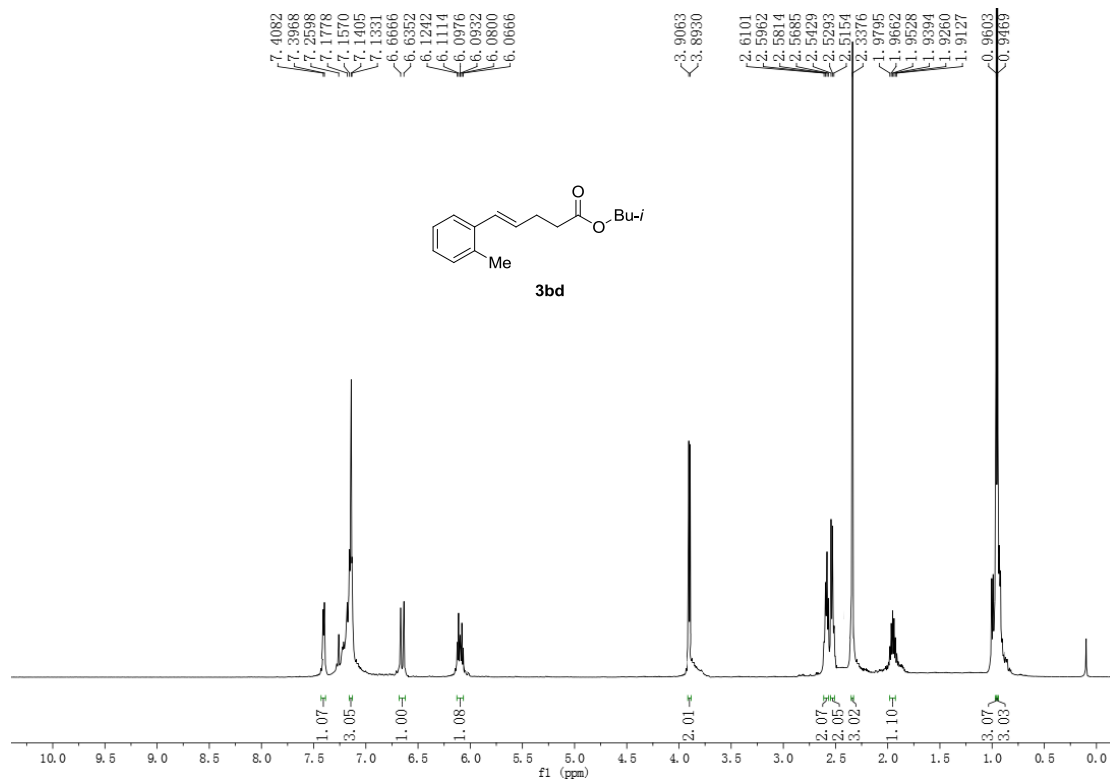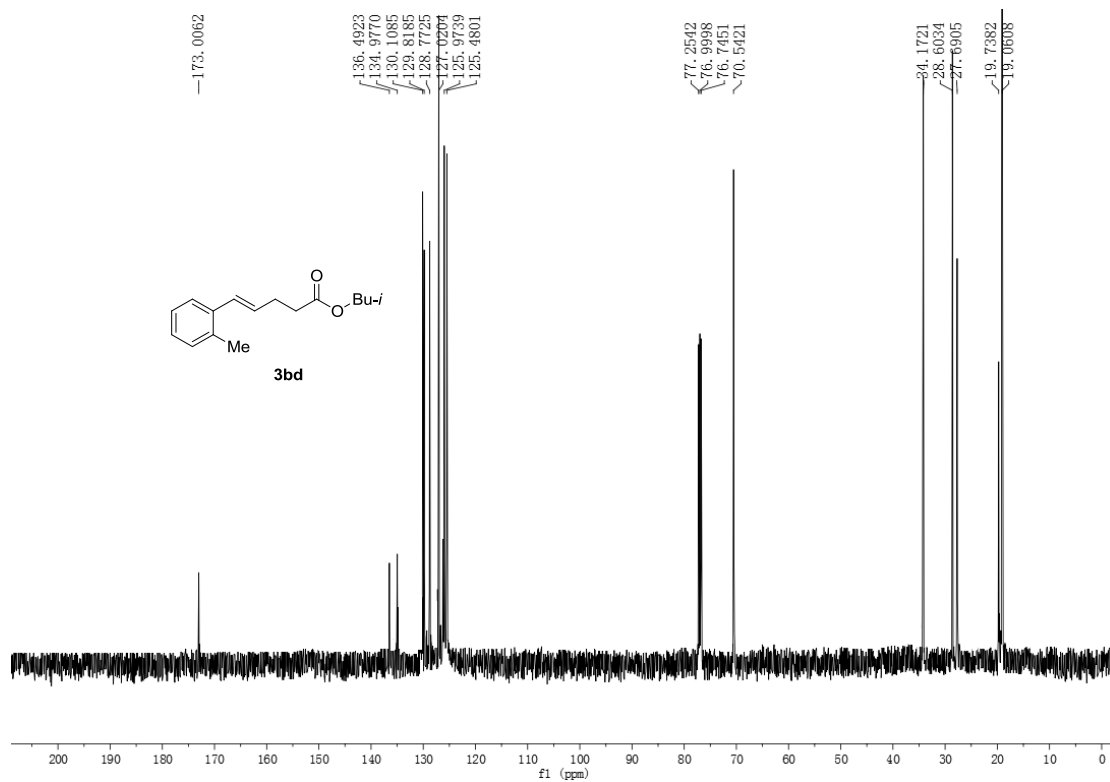

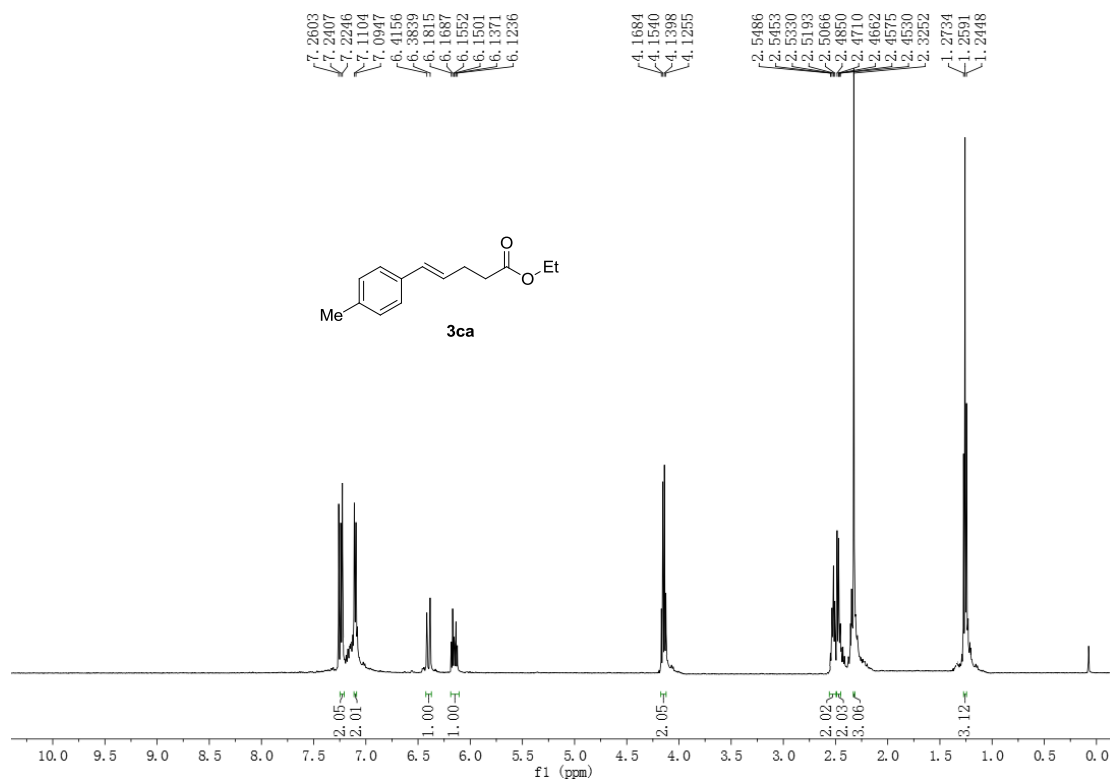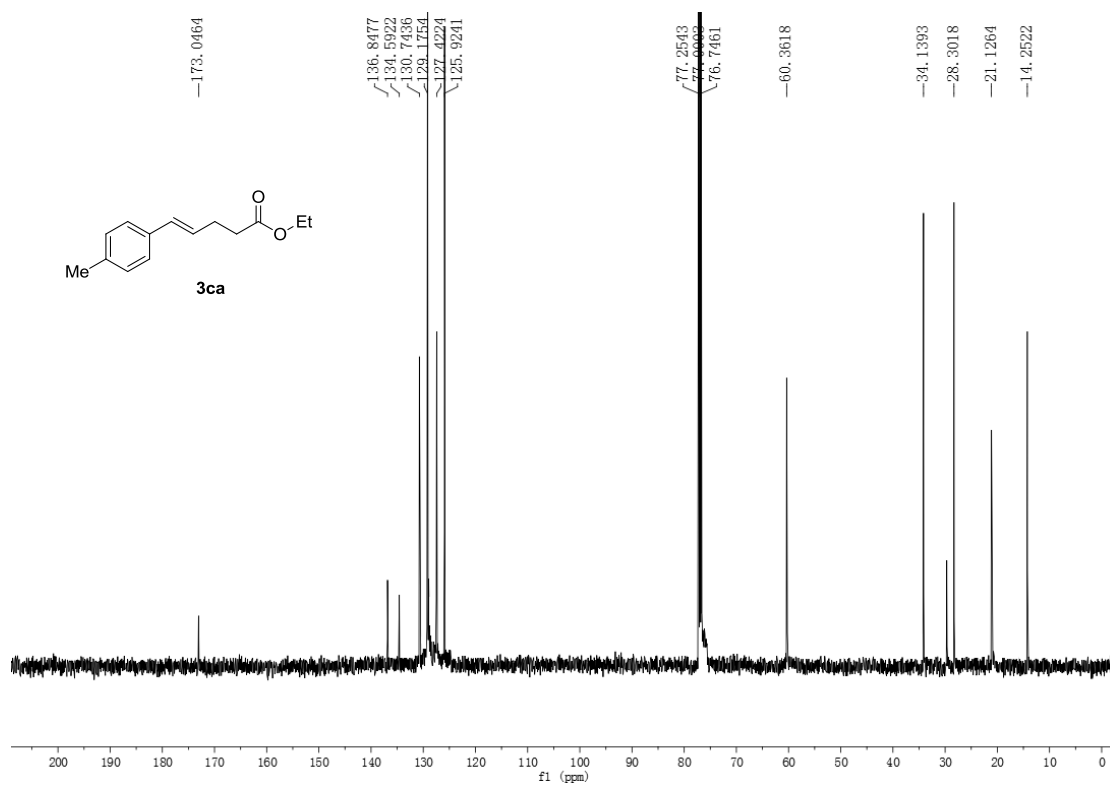

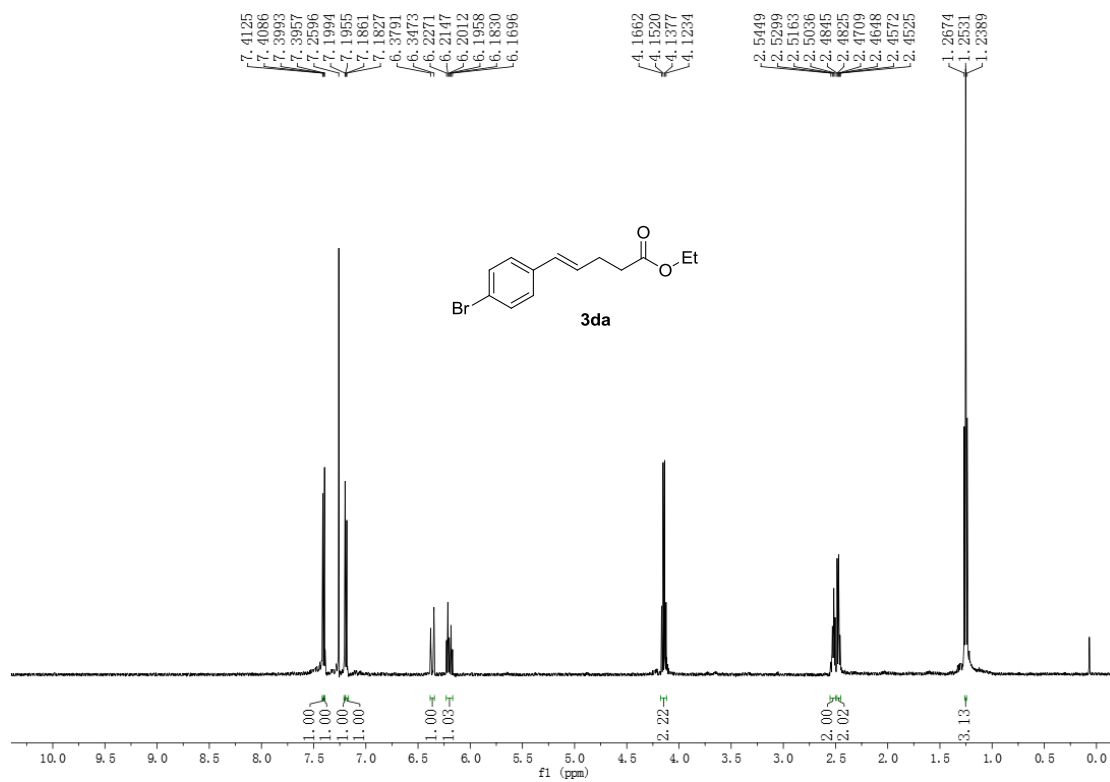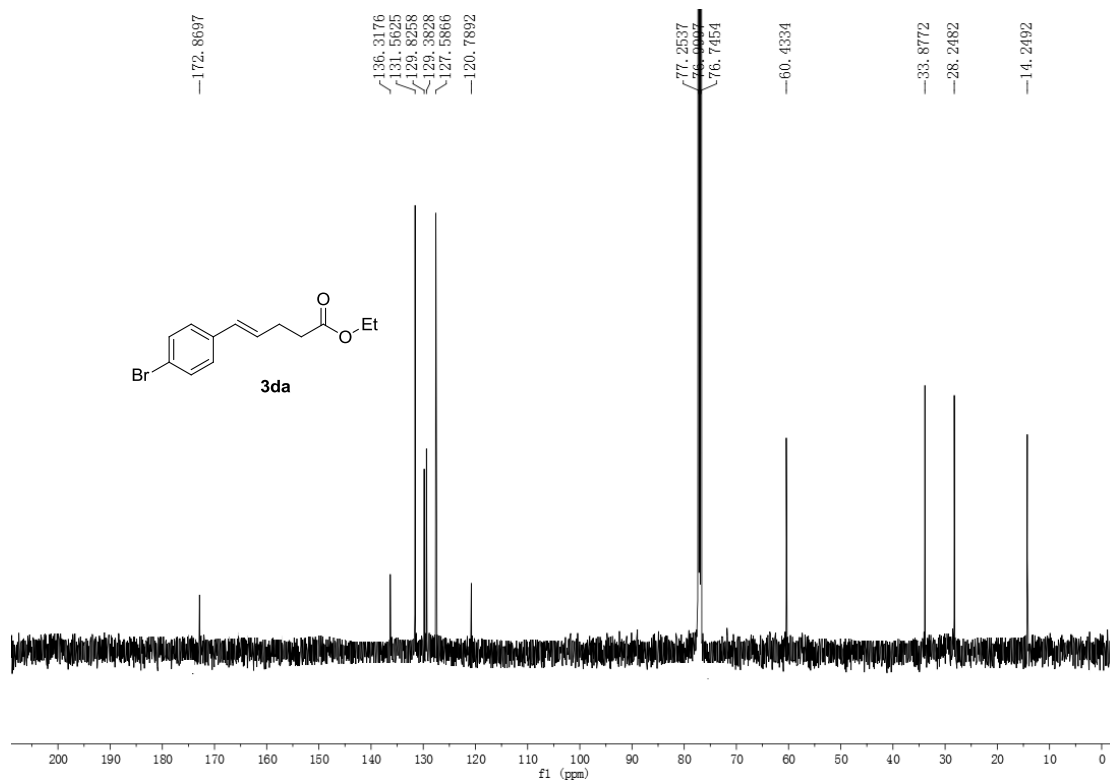



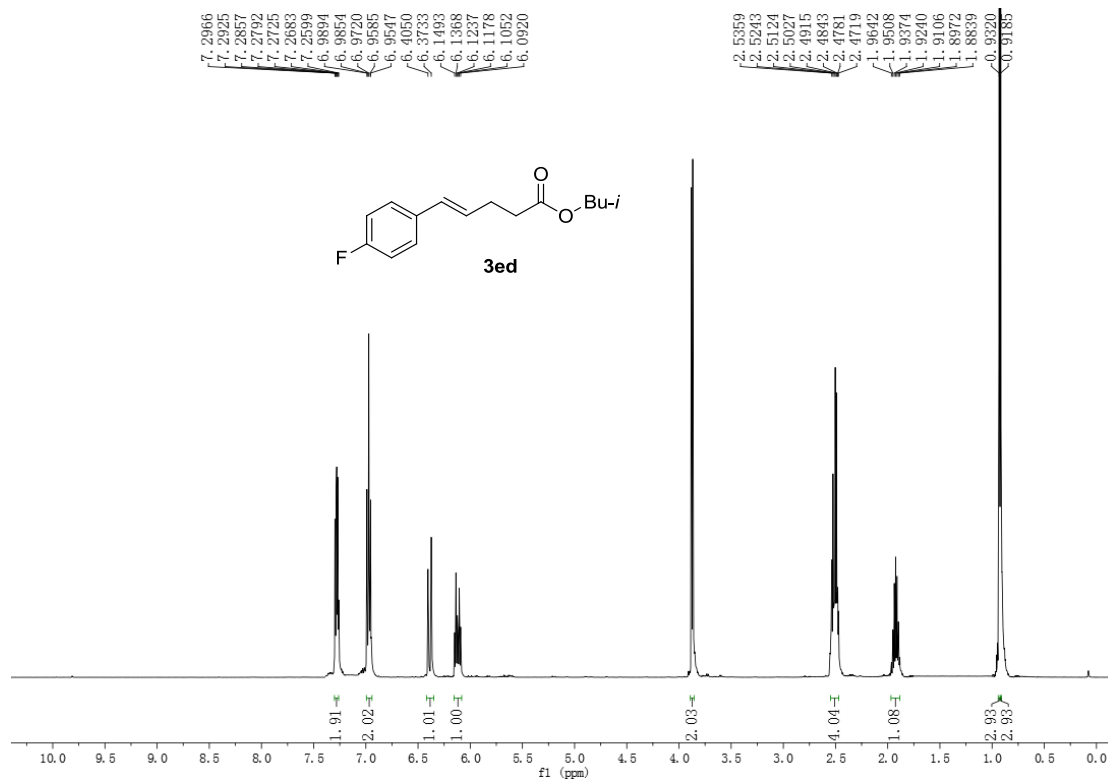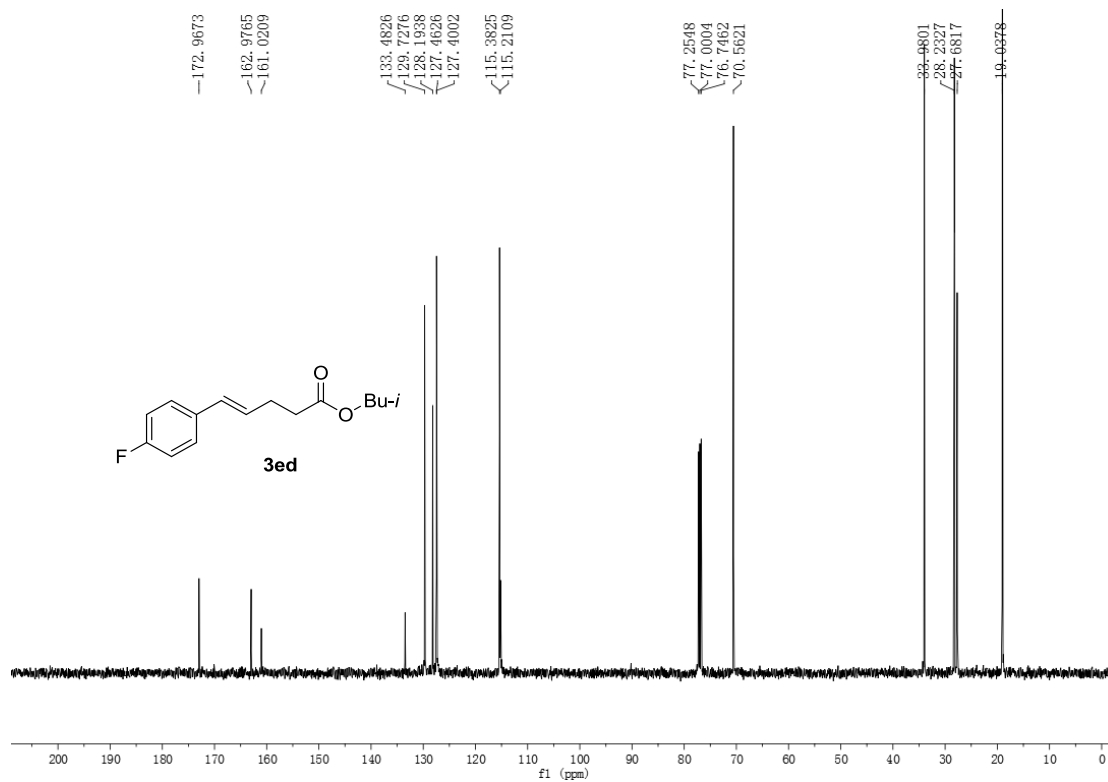

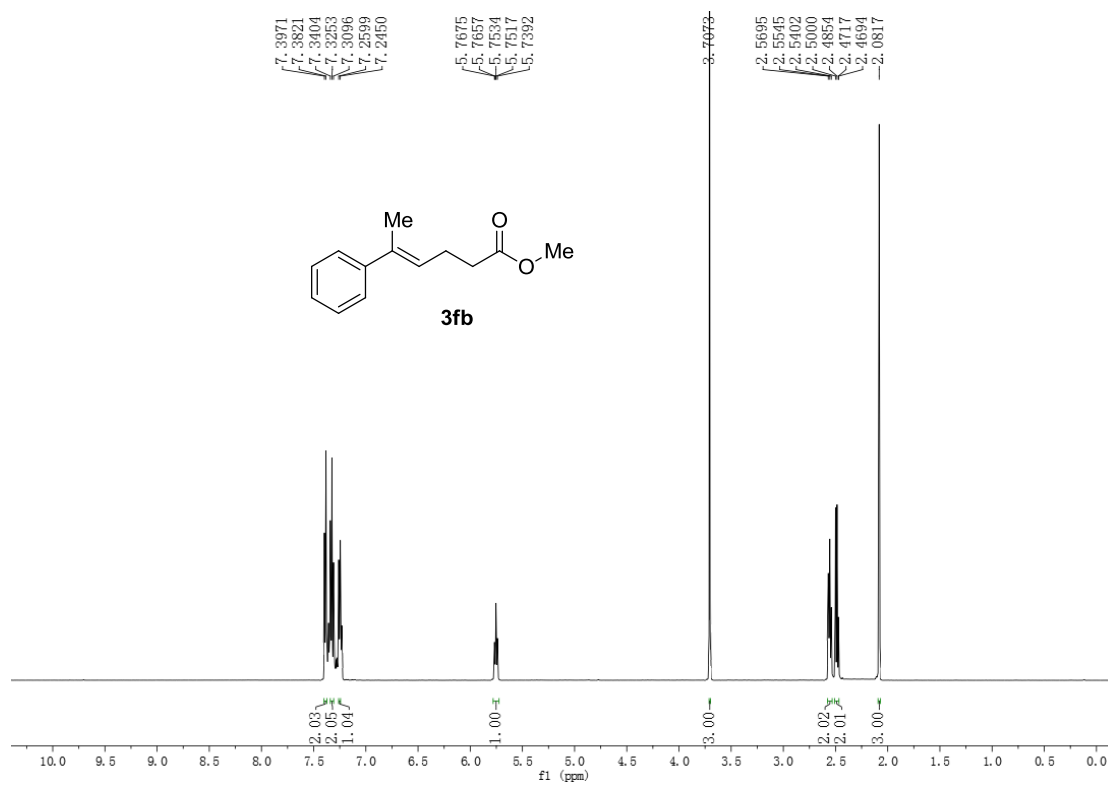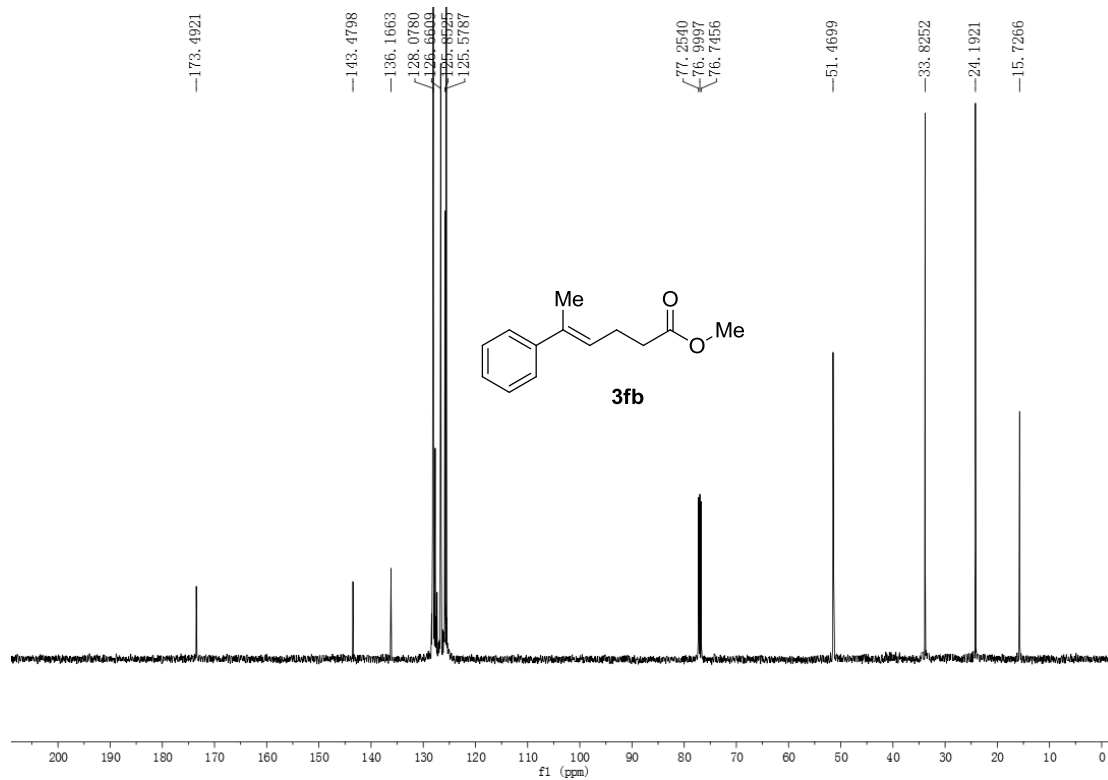

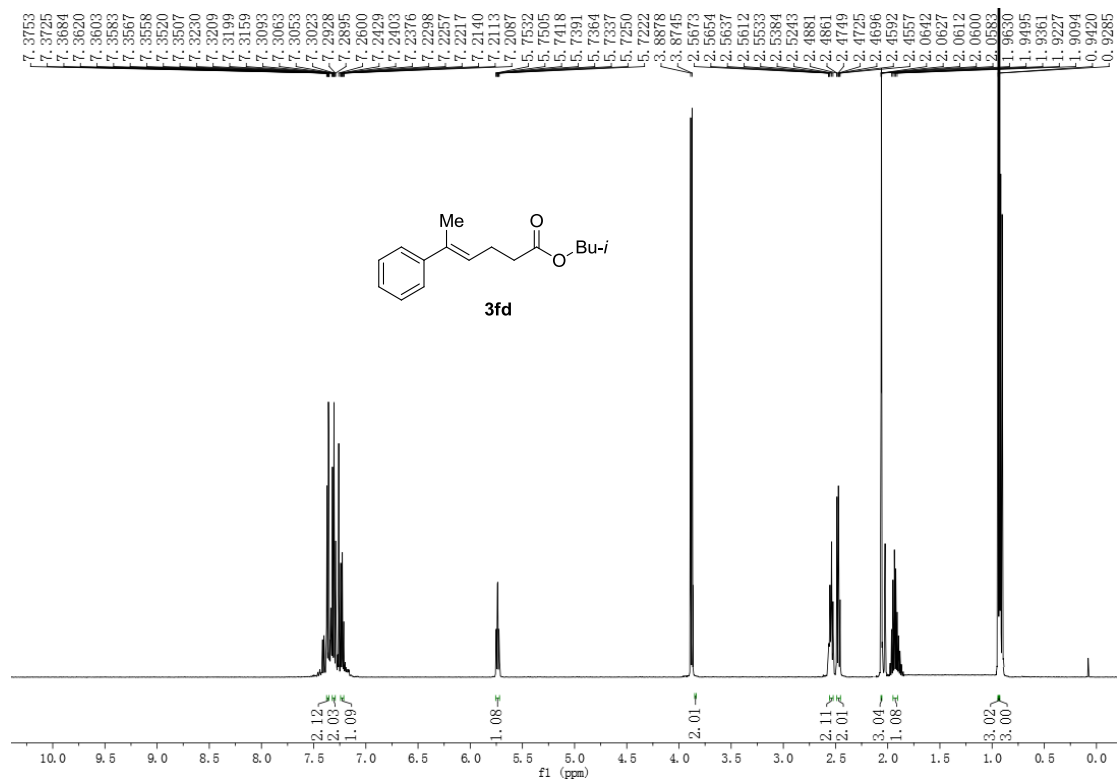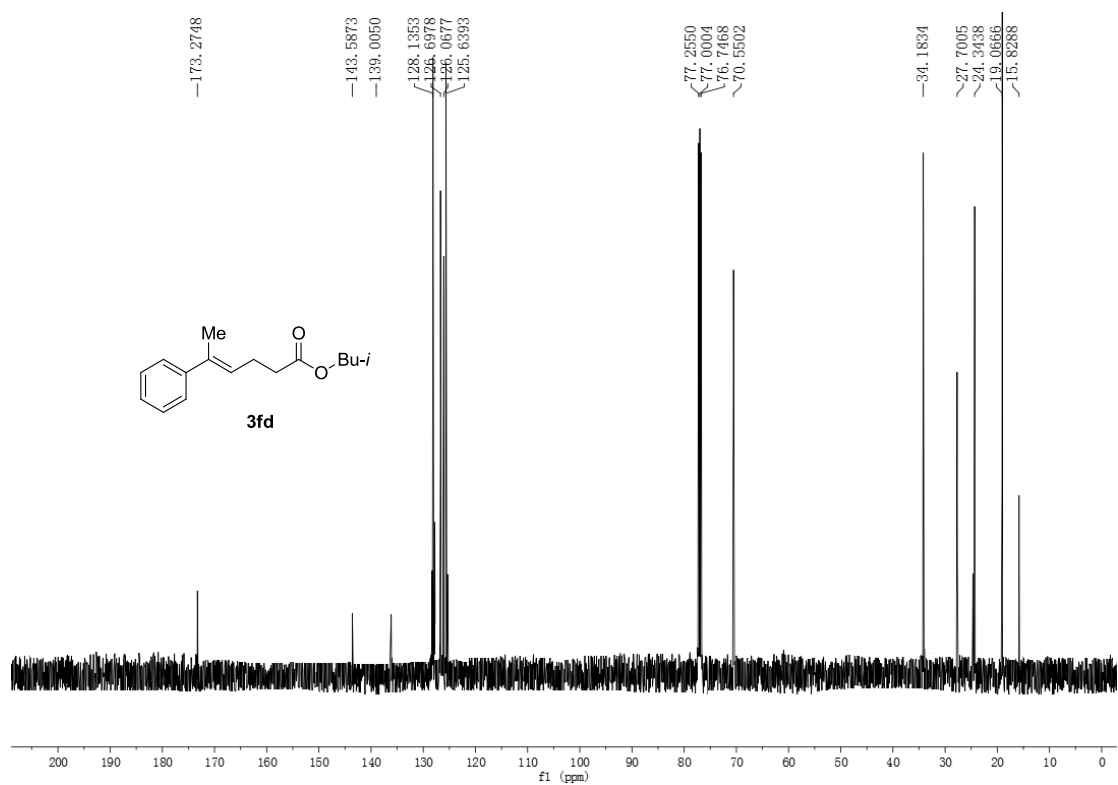

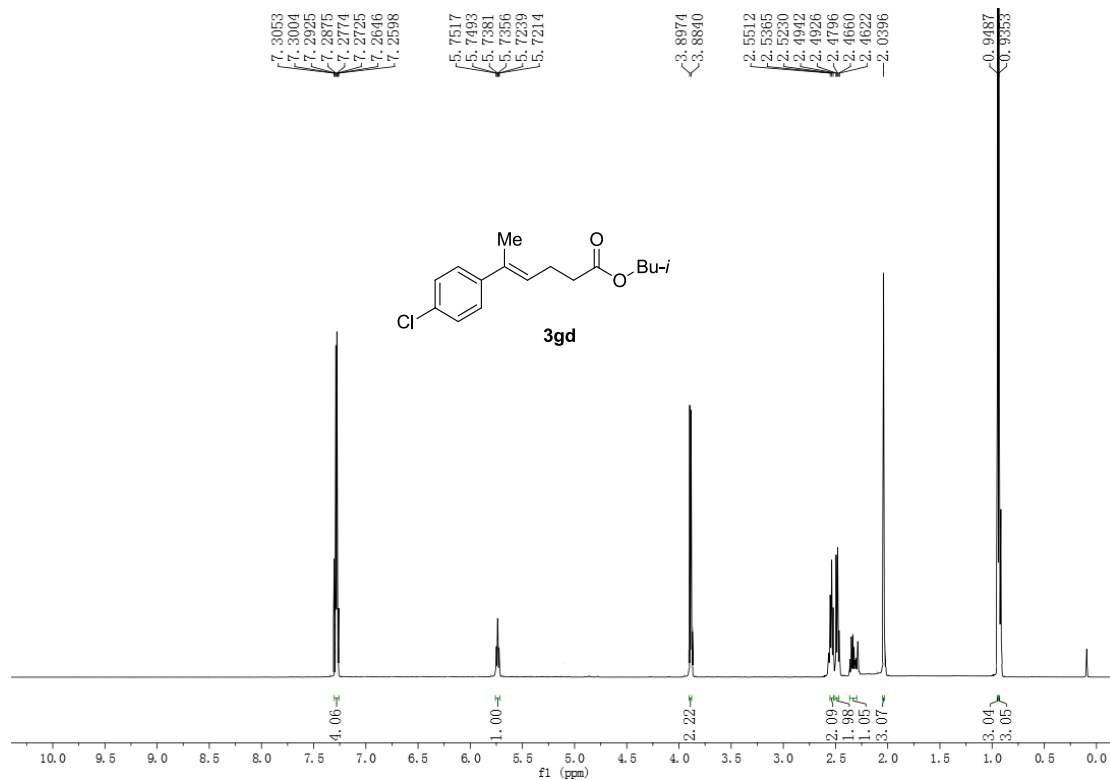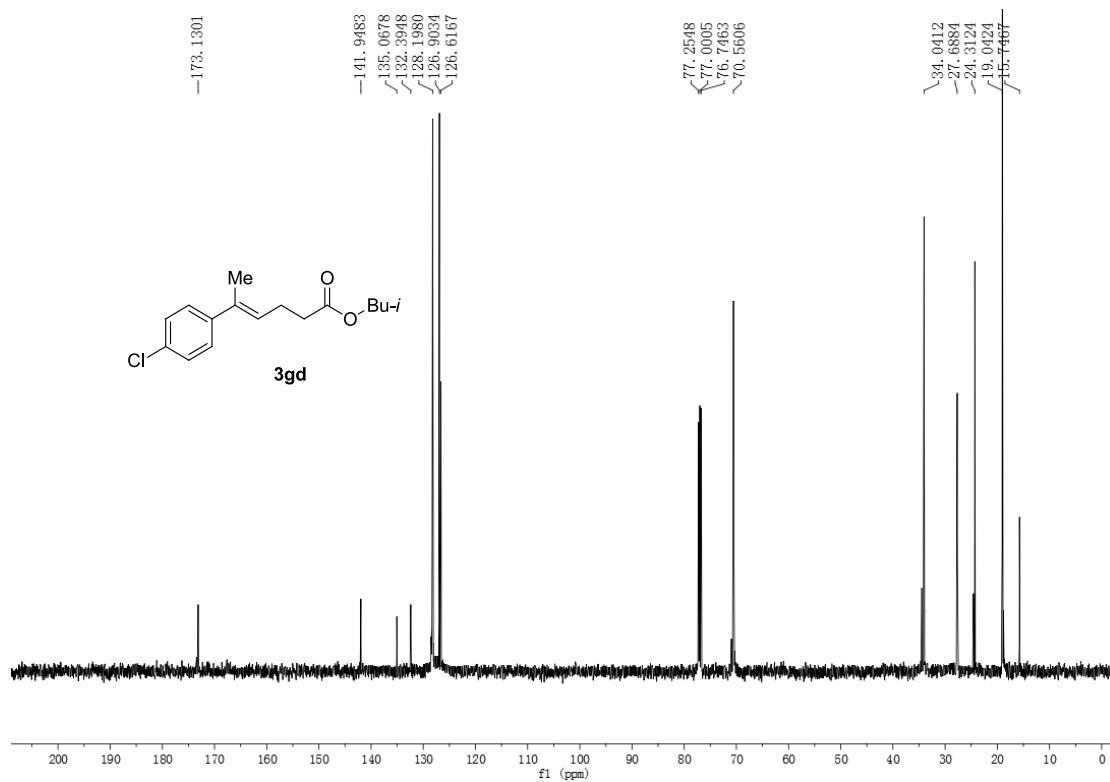

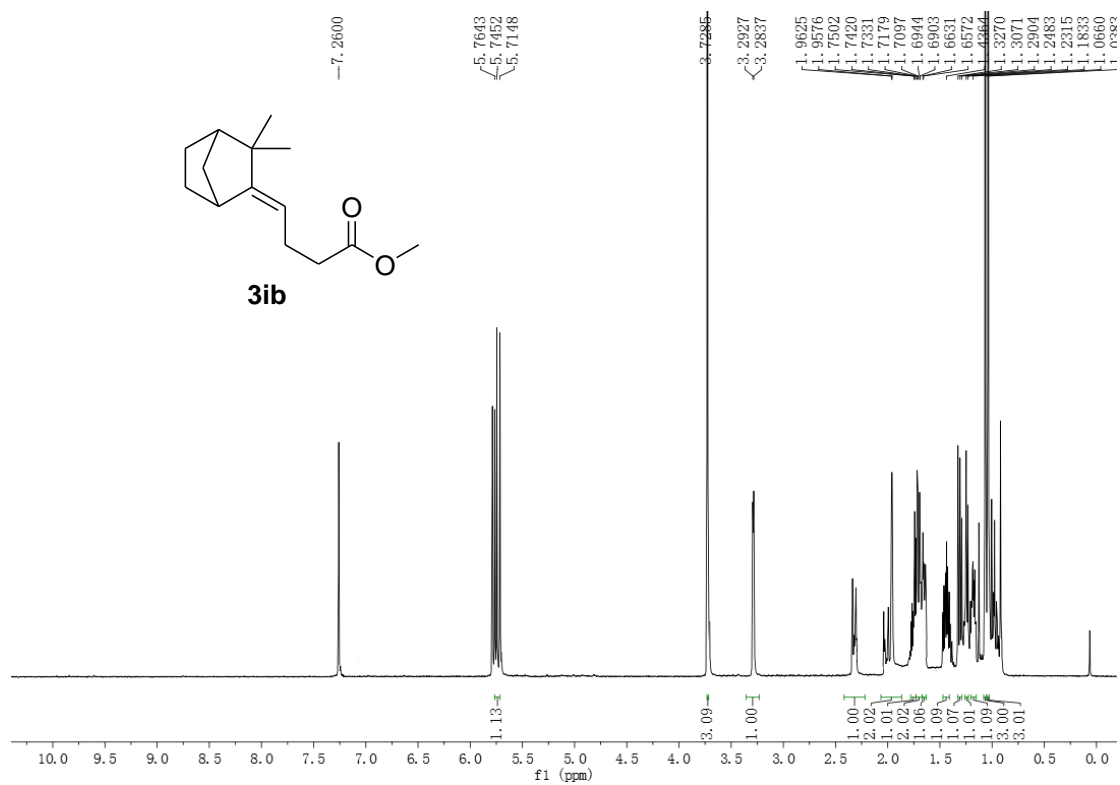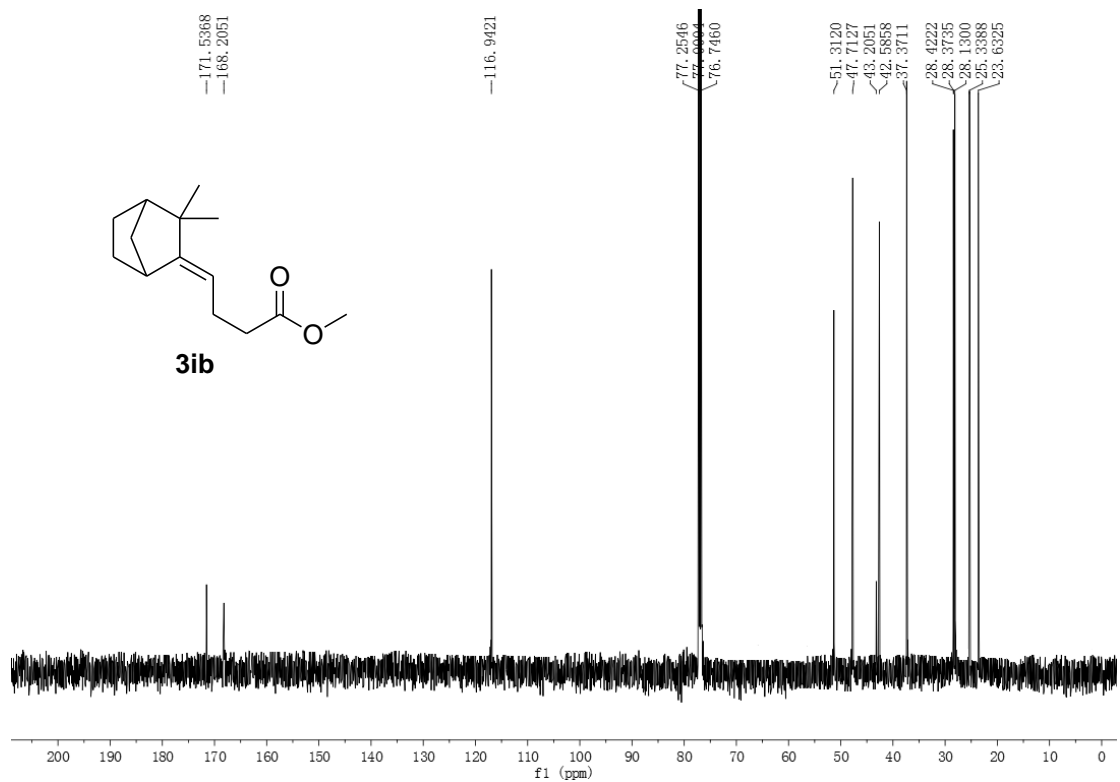

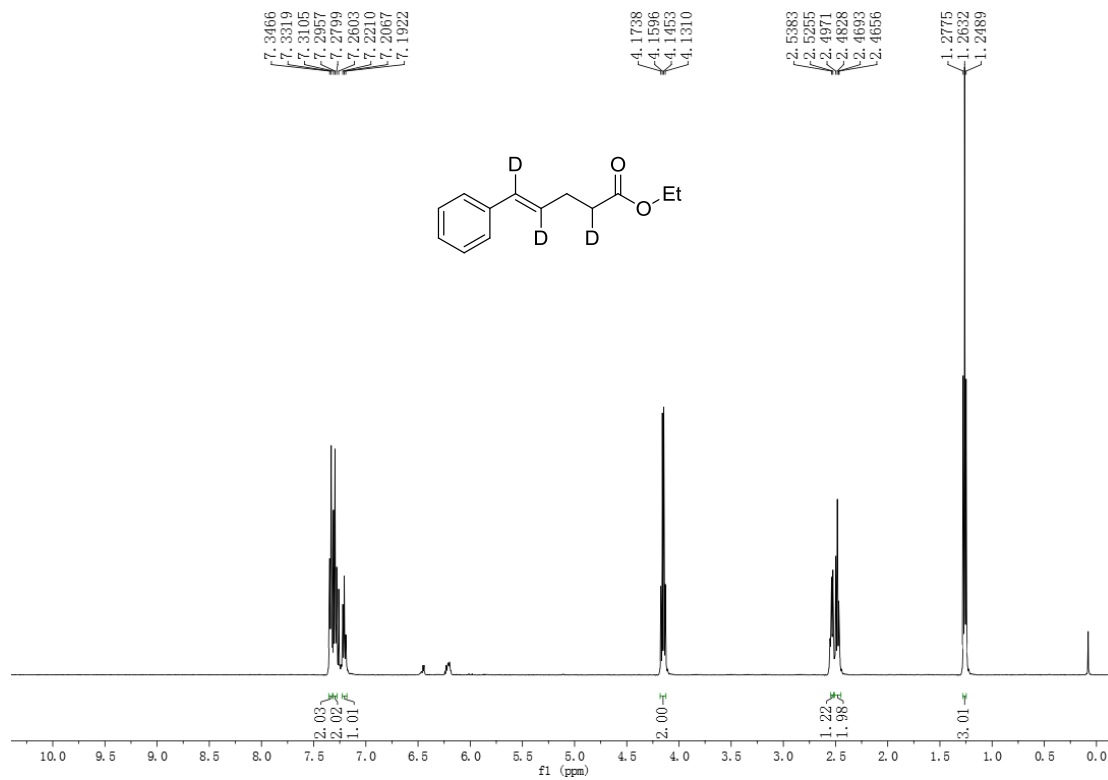

## 6 Copies of HRMS Spectra of Products

lp-p1tt\_120413162458 #14 RT: 0.05 AV: 1 NL: 1.52E5  
T: FTMS + p ESI Full ms [226.50-228.20]

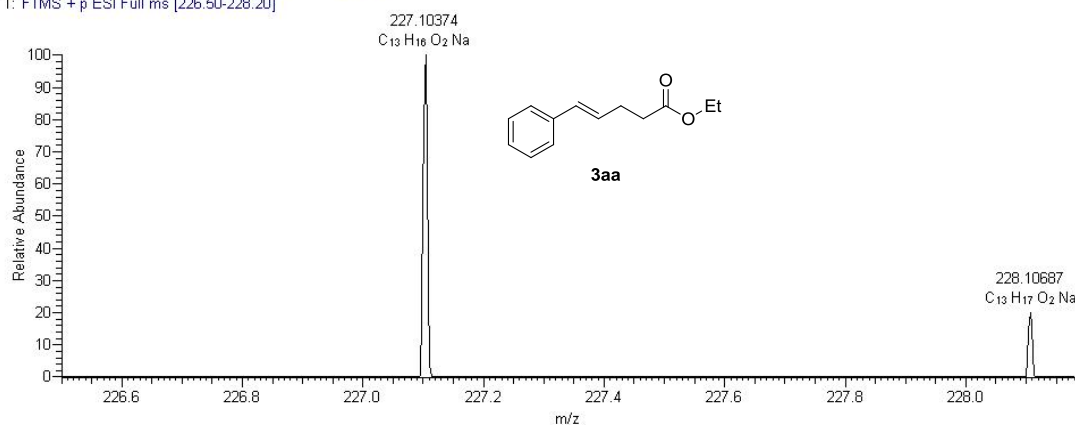

LP-P318-1 #245 RT: 0.83 AV: 1 NL: 8.76E4  
T: FTMS + p ESI Full ms [189.20-200.00]

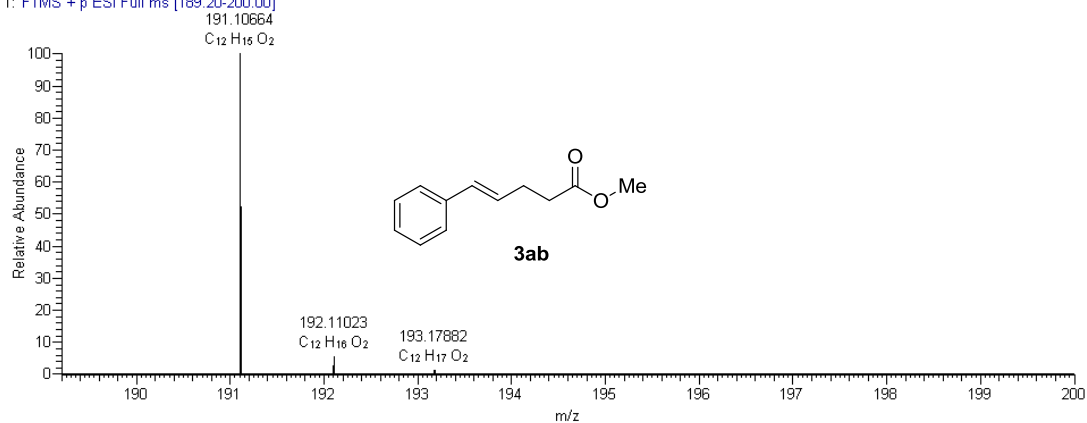

p325-2 #225 RT: 0.76 AV: 1 NL: 1.98E7  
T: FTMS {1,1} + p APCI corona Full ms [200.00-600.00]

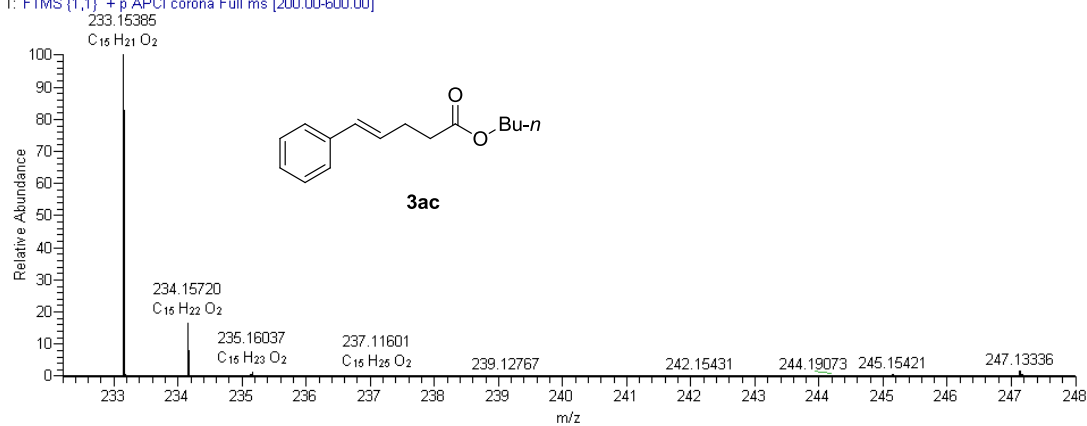

p325-1 #290 RT: 0.98 AV: 1 NL: 1.05E7

T: FTMS (1,1) + p APCI corona Full ms [200.00-600.00]

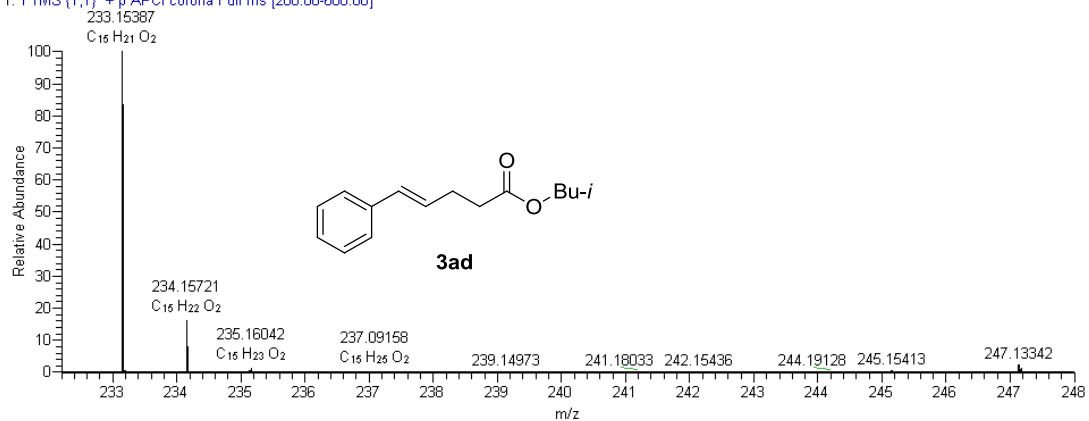

LP-P330-3 #115 RT: 0.86 AV: 1 NL: 4.93E5

T: FTMS + p APCI corona Full ms [232.30-240.00]

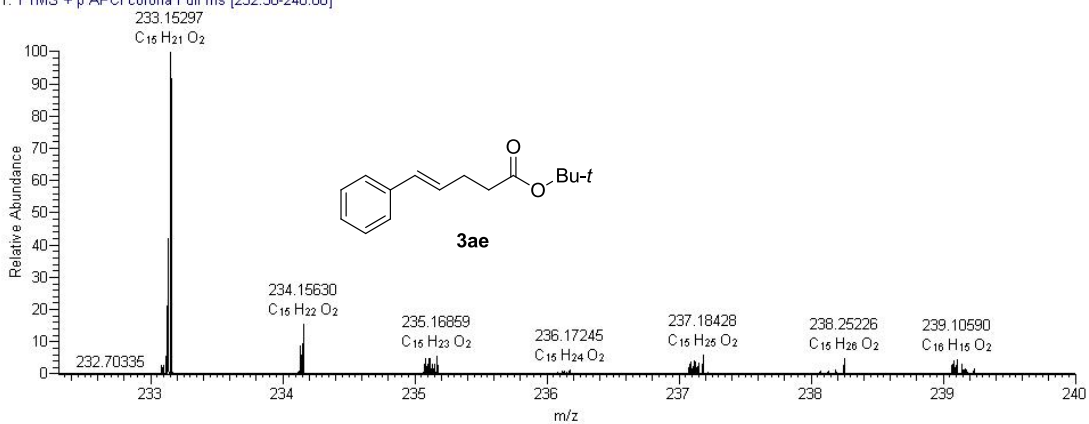

5\_121029120756 #270 RT: 0.91 AV: 1 NL: 3.65E6

T: FTMS (1,1) + p APCI corona Full ms [150.00-800.00]

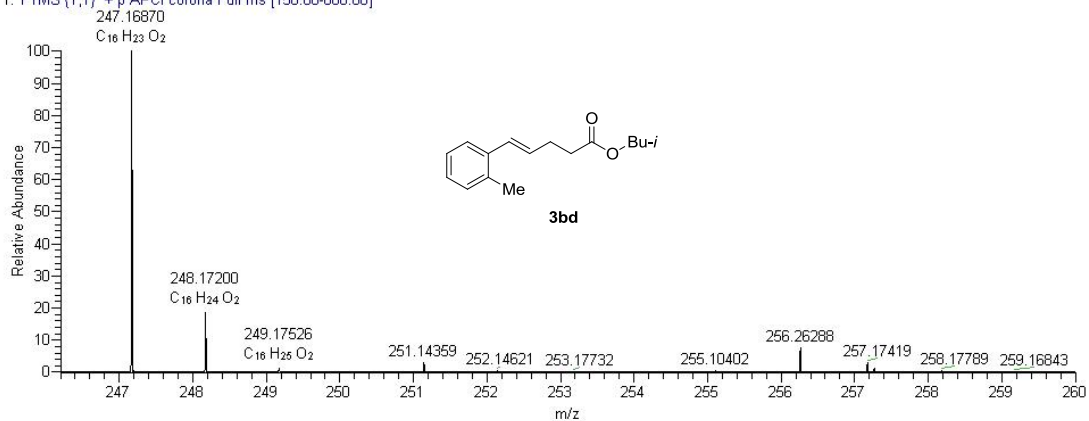



121210-1 #49 RT: 0.17 AV: 1 NL: 1.81E7  
T: FTMS + p APCI corona Full ms [210.00-240.00]

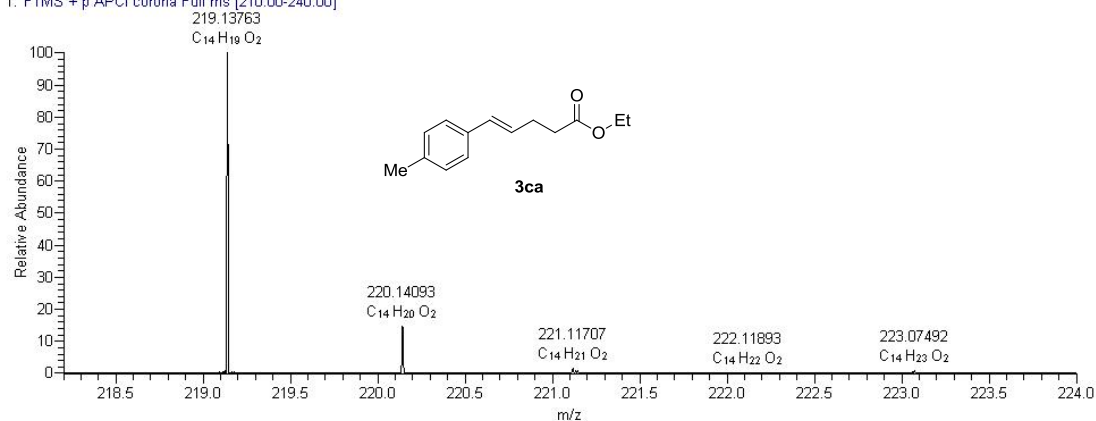

p295-3\_12092111401 #25 RT: 0.13 AV: 1 NL: 5.98E4  
T: FTMS + p APCI corona sid=80.00 Full ms2 1000.00@hcd40.00 [282.00-290.00]

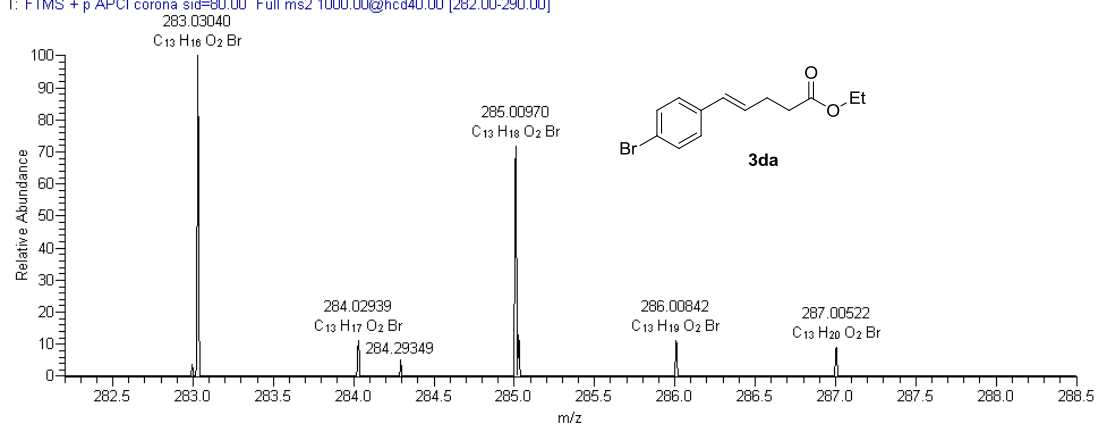

2\_121029115642 #281 RT: 0.95 AV: 1 NL: 2.42E6  
T: FTMS (1,1) + p APCI corona Full ms [150.00-800.00]

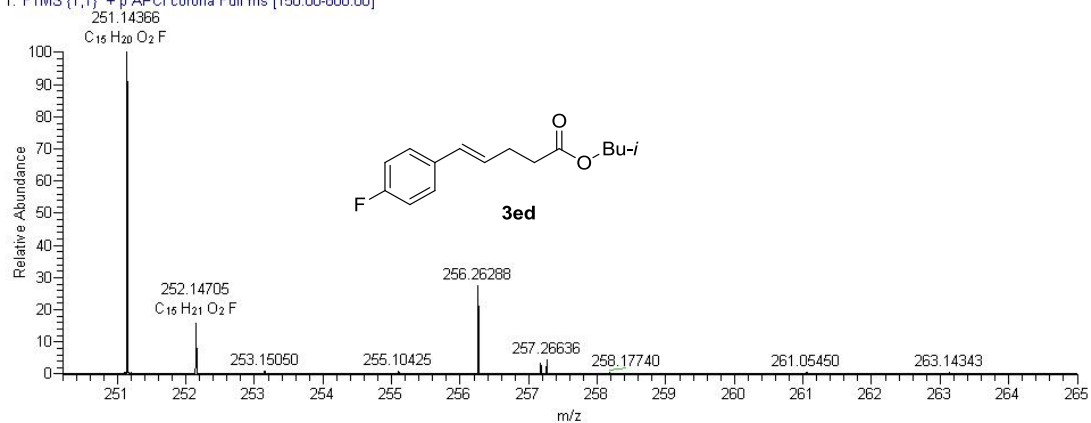

LP-P323-3\_120920112351 #316 RT: 1.07 AV: 1 NL: 1.78E5  
T: FTMS + p ESI Full ms [200.00-215.00]

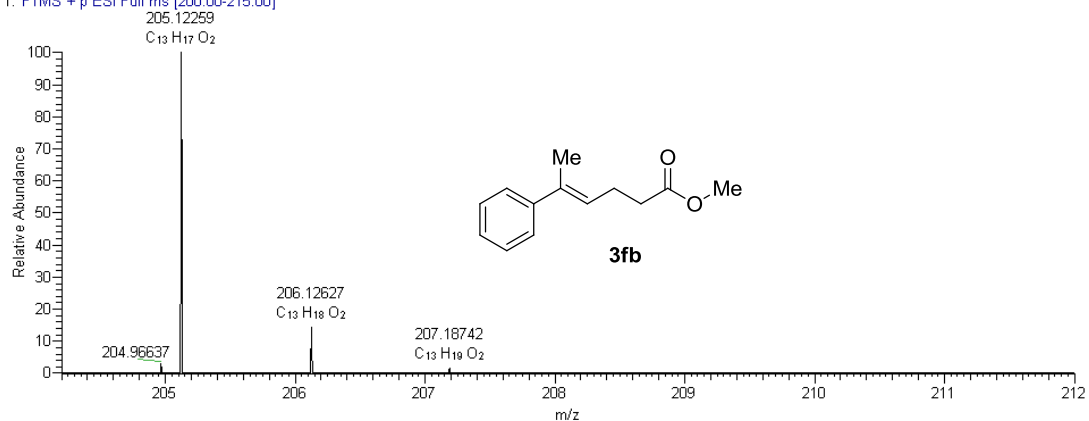

p326-1 #255 RT: 0.86 AV: 1 NL: 2.94E7  
T: FTMS (1,1) + p APCI corona Full ms [200.00-600.00]

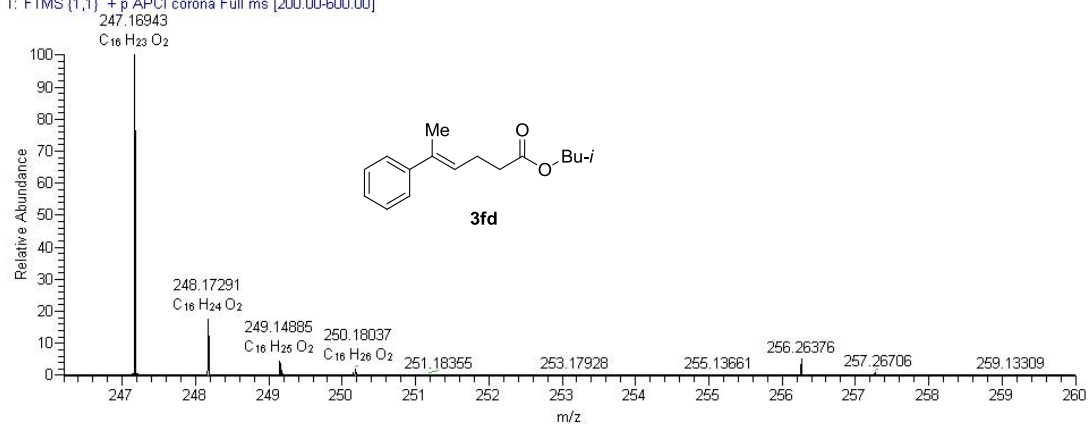

130104-P332-7\_130104104340 #52 RT: 0.18 AV: 1 NL: 7.88E5  
T: FTMS + p APCI corona Full ms [280.00-290.00]

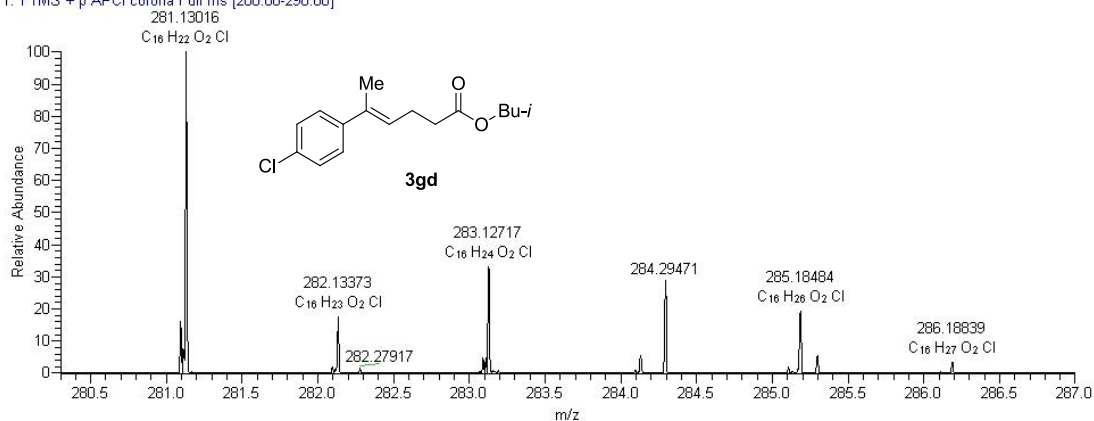

130104-P320-2\_130104102645 #26 RT: 0.09 AV: 1 NL: 1.34E6  
T: FTMS + p APCI corona Full ms [222.20-230.00]

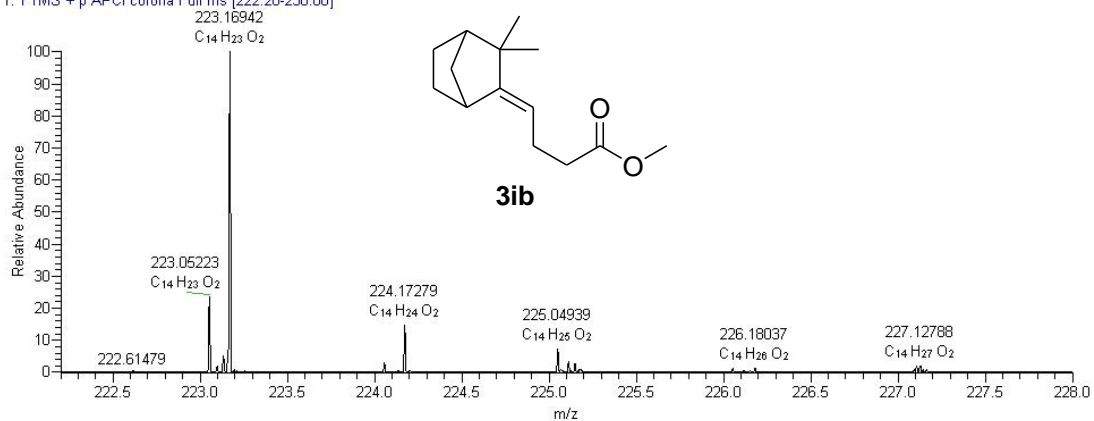

Supplement: c3cc41742e.pdf [file c3cc41742e.pdf]
